1           **Fitness benefits of providing services to others: Sociality predicts survival in a**  
2                                           **neotropical primate**

3  
4  
5           Kotrina Kajokaite<sup>\*a</sup>, Andrew Whalen<sup>b</sup>, Jeremy Koster<sup>a,c</sup>, and Susan Perry<sup>d,e</sup>

6  
7  
8   a. Department of Human Behavior, Ecology and Culture, Max Planck Institute for  
9   Evolutionary Anthropology, Leipzig, Germany

10   b. The Roslin Institute and Royal (Dick) School of Veterinary Studies, The University of  
11   Edinburgh, Edinburgh, UK

12   c. Department of Anthropology, University of Cincinnati, Cincinnati, OH, USA

13   d. Department of Anthropology, University of California, Los Angeles, CA, USA

14   e. Behavior, Evolution and Culture Program, Department of Anthropology, University of  
15   California, Los Angeles, USA

16

17

18   \* Corresponding author: Kotrina Kajokaite, Department of Human Behavior, Ecology and

19   Culture, Max Planck Institute for Evolutionary Anthropology, Deutscher Platz 6 04103

20   Leipzig, Germany

21

22

23 ABSTRACT

24           Across multiple species of social mammals, evidence is accumulating that  
25 sociality is associated with fitness. In long-lived species, like primates, lifespan is one of  
26 the main fitness components. Here, we provide the first direct evidence that females  
27 who provide more in social services live longer. We used 18 years of data from the  
28 Lomas Barbudal Monkey project to quantify sociality in 11 capuchin (*Cebus capucinus*)  
29 social groups using three interaction types: grooming, support in coalitionary  
30 aggression, and foraging in close proximity. We analyzed each domain separately to  
31 understand how giving and receiving social favors impact survivorship. To estimate  
32 female sociality in each of these domains, we built an adaptation of the Social Relations  
33 Model. This approach enabled us to estimate individual rates of giving and receiving  
34 interactions and take into account the uncertainty in these estimates due to varying  
35 amounts of observations of each individual. Subsequently, we modeled adult females'  
36 survival as a function of their sociality estimate, rank, age, group size, and maternal kin  
37 presence using a Bayesian Cox proportional hazards model. We found that females who  
38 provide more grooming to other group members survive longer. There was no strong  
39 evidence that females who receive more grooming, participate more often in  
40 coalitionary aggression, and forage more often in close proximity of others also have  
41 higher survivorship. These results add a neotropical primate species to the growing list  
42 of mammals, including humans, where greater sociality is associated with longevity.

43

44

## 45 INTRODUCTION

46           A key question for understanding the evolution of animal sociality is: Do animals  
47 that are more social enjoy greater fitness benefits? A number of studies link  
48 components of reproductive success, such as fecundity (white-faced capuchins, *Cebus*  
49 *capucinus*: Fedigan et al., 2008; Assamese macaques, *Macaca assamensis*: Schülke et  
50 al., 2010; chimpanzees, *Pan troglodytes schweinfurthii*: Gilby et al., 2013) and offspring  
51 survival (yellow baboons, *Papio cynocephalus ursinus*: Silk, 2009; savannah baboons,  
52 *Papio cynocephalus*: Silk et al., 2003; white-faced capuchins, *Cebus capucinus*: Kalbitzer  
53 et al., 2017), to differences in the social behavior of individuals.

54           In long-lived species, lifespan is also an important component of reproductive  
55 success contributing to fitness variation (Clutton-Brock, 1998). The most abundant  
56 evidence that individual sociality affects lifespan has accumulated in human literature.  
57 Both the presence and the absence of social relationships affects lifespan. That is, being  
58 socially connected is associated with a lower probability of dying (Holt-Lunstad et al.,  
59 2010; Shor and Roelfs, 2015; Shor et al., 2013), while having few and poor social  
60 relationships is associated with a higher risk of death (Roelfs et al., 2011).

61           In nonhuman species there is similar evidence that individual sociality is  
62 associated with lifespan. Among baboons, females who maintain stable social  
63 relationships with other males and females live longer (chacma baboons, *Papio*  
64 *hamadryas ursinus*, Silk et al., 2010; Archie et al., 2014). Prime-aged female macaques of  
65 Cayo Santiago who have more living adult female relatives live longer (Brent et al.,  
66 2017). Blue monkey females (*Cercopithecus mitis stuhlmanni*) who have strong and

67 enduring social relationships consistently with the same partners tend to live longer in  
68 comparison to females whose strong partnerships are inconsistent across years  
69 (Thompson and Cords, 2018). Female rats who cultivate reciprocal affiliations with their  
70 sisters survive longer (Yee et al., 2008), and brown bear cubs who play longer during  
71 summer survive better (*Ursus arctos*) (Fagen and Fagen, 2004). More social juvenile feral  
72 horses (*Equus caballus*) live longer than their less social peers. However, facultatively  
73 social yellow-bellied marmots (*Marmote flaviventer*) show the opposite pattern: more  
74 social marmots live shorter lives than less social marmots (Blumstein et al., 2018).

75 Neotropical primates are not represented among the studies that report the link  
76 between sociality and longevity. Capuchin monkeys are an excellent neotropical primate  
77 species for the investigation of these associations: Despite the long evolutionary history  
78 that separates them from humans and cercopithecines (Porter et al., 1997), their social  
79 structure is similar to cercopithecine primates (Perry, 2012).

80 In this paper, we investigate whether more social white-faced capuchin females  
81 live longer than less social females. We analyzed eighteen years of capuchin monkeys'  
82 social interactions taken from the Lomas Barbudal Monkey dataset. To quantify  
83 individual sociality, we selected interactions from three domains to represent the  
84 variety of social behaviors that capuchin monkeys engage in: grooming, coalitionary  
85 aggression, and foraging in proximity to others. To deal with different amounts of  
86 observations for each individual, we used the multilevel Social Relations Model (Snijders  
87 and Kenny, 1999; Koster et al. 2019) to decompose the observations of exchanges of  
88 these interactions into separate individual giving, individual receiving, and dyadic

89 relationship components. This approach allowed us to estimate the uncertainty in  
90 sociality estimates, which can be substantial for individuals with small numbers of  
91 observations. Then, we used the individual giving and individual receiving posterior  
92 means and standard deviations (SD) from these models as sociality measures to model  
93 adult female longevity using the Bayesian Cox proportional hazards model.

94 We found that adult female capuchins provide most of the grooming in the  
95 population. However, they display considerable variation in their propensity for  
96 grooming others, and some adult females are among the least frequent groomers in the  
97 population. The variation in *giving grooming* measures predicts longevity: Females who  
98 provide more grooming live longer than the females who provide less grooming.  
99 Measures in other interactions – *receiving of grooming, giving and receiving of*  
100 *coalitionary support, and foraging in close proximity* – were similar in their distribution  
101 to the rest of the population. In addition, females were more similar to each other in  
102 these interactions, especially in how much grooming they received, i.e. the females who  
103 were the most and the least likely to be groomed were not very different from an  
104 average monkey in the population. The females who engaged more in these interactions  
105 seemingly experienced some benefits associated with longevity, but the model  
106 estimates were uncertain. Therefore, the evidence does not support a strong  
107 association between longevity and the sociality measures we considered (*grooming*  
108 *receiving, participating in coalitionary support, and foraging in close proximity of*  
109 *others*).

110

111 METHODS

112 *Study subjects and the dataset*

113 We studied members of the wild white-faced capuchin population at the Lomas  
114 Barbudal Biological Reserve and surrounding private lands in Guanacaste, Costa Rica  
115 (Perry et al., 2012). The Lomas Barbudal Monkey Project dataset has longitudinal  
116 records on individuals living in 11 capuchin social groups. It contains detailed records  
117 including demographic information, pedigree information, and data regarding social  
118 interactions that are necessary for quantifying individual sociality.

119 White-faced capuchins live in multimale, multifemale social groups (Perry, 2012).  
120 Females are philopatric – they stay in their natal groups for their entire lives – which  
121 allows researchers to collect data about the social interactions from large portions of  
122 their lives (Fragaszy et al., 2004; Perry et al., 2008). As a result, females' demographic  
123 and behavioral records are more complete than males' records because males transfer  
124 to different groups multiple times in their lives and often leave the study area. This  
125 makes female capuchins more suitable subjects for the investigation of the relationships  
126 between individual sociality and survival.

127 The records on capuchin behavior were collected between January 2002 and  
128 December 2019. The subjects were 132 adult females, living in eleven different social  
129 groups over 146 group years (average years of observation per group = 13.27; range = 7  
130 – 18 years). The females were considered adults once they reached the age of 5 years.  
131 The behavioral and demographic data on each group were collected by experienced  
132 observers during censuses lasting at least 6 hours/day.

133 *Measuring Sociality*

134           To measure female sociality, we chose three behavioral domains: grooming,  
135 coalitionary aggression, and foraging. We treated grooming and coalition formation as  
136 directed behaviors, and we used observations of individuals as both initiators and  
137 recipients of the behavior. We did not have information about which individual had  
138 initiated the proximity when foraging, and therefore foraging in proximity was treated  
139 as an undirected behavior. In calculating the frequency with which adult females  
140 engaged in these interactions, we used behavioral records from all the individuals who  
141 resided in the 11 groups during the study period. There were a total of 563 monkeys,  
142 residing in 11 social groups, comprising 13,770 dyads. We treated each of the five  
143 interaction types (*grooming giving, grooming receiving, support giving, support*  
144 *receiving, forage in proximity*) as a separate measure of sociality.

145 *Grooming (groom giving and groom receiving)*

146           Allogrooming, or social grooming, is a common behavior in capuchin monkeys  
147 (Perry, 1996). Grooming serves a hygienic and social bonding function and is thought to  
148 impose costs on groomers of loss of time and increased vigilance (Manson et al., 2004).  
149 These features of grooming behavior make it a good candidate for providing information  
150 regarding an individual's sociality.

151           Grooming rates were estimated using data collected during 10-minute focal  
152 follows. To estimate individual grooming rates, we calculated dyadic counts of grooming  
153 and dyadic opportunities for grooming. The opportunity for a dyad, A-B, to engage in  
154 grooming, was calculated as the sum of the focal follows of A and the focal follows of B

155 at times when A and B were residents of the same social group. The dyadic counts of  
156 giving and receiving grooming were assigned as follows: a count of 1 was assigned if A  
157 groomed B at least once during a focal follow, otherwise 0 was assigned. The same was  
158 done when evaluating if B groomed A.

159 *Joining a coalitionary conflict (support giving and support receiving)*

160           Coalitionary aggression is frequent in capuchin monkeys (Perry, 2012).  
161 Intergroup encounters are characterized by high rates of coalitionary lethal aggression  
162 (Gros-Louis et al., 2003), and coalitions play an important role in male competition for  
163 reproductive opportunities (Perry, 2012). Intragroup conflicts are far less dangerous;  
164 they often do not result in physical fighting, and individuals are rarely injured (Perry,  
165 2012). Capuchins have stereotyped signals for recruiting allies in conflicts (Perry, 2012),  
166 and participation in coalitionary aggression is likely based on social relationships  
167 between the partners (Kajokaite et al., 2019).

168           The behavior of joining a coalitionary conflict was defined as an individual  
169 intervening on one side during an ongoing aggressive conflict. This definition only  
170 indicates the functional aspect of joining a side; it entails no inferences about internal  
171 psychological states such as the intent to help a specific individual. Since aggressive  
172 interactions are salient and harder to miss than quiet activities like grooming or foraging  
173 in proximity, aggressive interactions were collected both *ad libitum* and during focal  
174 follows. The chronological stream of aggressive behaviors was divided into 5 min.  
175 segments. In order to identify instances of joining a coalitionary conflict, monkey A is  
176 identified as joining monkey B if A performed an aggressive behavior toward either



177 monkey B's opponent or victim within the context of the 5-minute segment. Even if  
178 multiple instances of A joining monkey B were observed during the 5 min segment, we  
179 scored only one instance of A joining B. To calculate the opportunities to join a  
180 coalitionary conflict, all individuals who were co-resident during the aggressive conflict  
181 were counted as having had an opportunity to join on either side during the conflict.

#### 182 *Foraging in proximity*

183           Although foraging is a seemingly asocial behavior, the way individuals  
184 distribute themselves across space can be indicative of their social relationships with  
185 group members. It can be costly to tolerate another individual near you (more  
186 competition for food) and monkeys might only tolerate proximity of individuals with  
187 whom they maintain good social relationships.

188           *Foraging in close proximity* was estimated from group scans that occurred in  
189 the context of foraging. In group scans, the identity of the scanned individuals, their  
190 activity and their proximity to other individuals within 10 body lengths (~2 m) was  
191 noted. We considered individuals to be foraging in close proximity if they were scanned  
192 within 5 body lengths (~1m) of each other. For each dyad, we scored whether they were  
193 observed foraging within close proximity in 10 min. segments (i.e. if they were observed  
194 doing this more than once within 10 min., only one instance was counted). The number  
195 of opportunities that the dyad had to forage within close proximity is a sum of group  
196 scans in the foraging context that are 10 min. apart, where one of the individuals is a  
197 subject of a group scan.

#### 198 *The Social Relations Model and Individual sociality measures*

199 Detailed longitudinal behavioral records are necessary for relating an individual's  
200 social behavior patterns to longevity (Clutton-Brock, 1988). Such data is hard to collect  
201 and resources are limited; therefore the more individuals we observe, the less  
202 information we collect on each one of them. The data for these analyses were collected  
203 across eighteen years and the number of social groups and individuals observed  
204 increased over time. As a result, data density is uneven across time periods, social  
205 groups, and individuals.

206 We incorporated uneven distribution of the data into our analyses as follows.  
207 First, we aggregated the data annually and used adaptations of the multilevel Social  
208 Relations Model (Snijders and Kenny, 1999; Koster et al. 2019) to estimate individual  
209 annual rates of grooming, coalitionary support, and foraging. This provided us with  
210 mean and standard deviation of individual sociality measures (see the supplemental  
211 material). Second, we used these distributions of individual sociality measures as  
212 predictors of longevity and to investigate the effects of social behavior on survivorship.

213 The Social Relations Model (Snijders and Kenny, 1999) decomposes the variance  
214 in giving and receiving behaviors into separate giving, receiving, and dyadic relationship  
215 components. We fitted a Bayesian multilevel Social Relations Model with the following  
216 parameters: the intercept parameter (base rate), social group-level, individual giving,  
217 individual receiving, dyadic symmetric, and dyadic asymmetric random effects  
218 parameters (see Koster et al. 2015). We used data collected on the entire population  
219 (i.e. adult males, females, and immatures) since the Social Relations Model is a  
220 multilevel model and can take advantage of additional data to estimate the average

221 rates of interactions in the population (McElreath, 2020). Although we estimated the  
222 random effects for all the individuals in the population, we used the adult female annual  
223 individual posterior mean and SD of *grooming giving*, *grooming receiving*, *support*  
224 *giving*, *support receiving*, and non-directional *foraging in proximity* rate estimates as our  
225 five measures of annual individual sociality.

226           The posterior estimates of mean and SD of female giving and receiving random  
227 effects capture the extent to which an individual female deviates from the estimated  
228 average rate of engaging in this behavior in the population. The individual sociality  
229 measures are centered on zero, which represents the population mean (an average  
230 monkey). Each behavior domain has its own population average estimate. For example,  
231 the individual estimates of *grooming giving* ranges from -3.14 to 3.27 across the entire  
232 population. For a particular individual, a posterior mean closer to the minimum (-3.14)  
233 indicates that this individual grooms others much less than the average monkey grooms  
234 her partners in the population. The inverse is true for a posterior mean estimate close to  
235 the maximum of the range (3.27). The SD reflects the measurement uncertainty from  
236 heterogenous sampling effort, where individuals who were observed less have posterior  
237 estimates with wider distributions around the posterior mean estimate.

### 238 *Modeling survival as a function of individual sociality measure*

239           To investigate whether sociality is associated with adult female longevity, we  
240 used Bayesian Cox proportional hazards models. In separate models, each of the five  
241 individual sociality measures was modeled as a predictor of survival probability over  
242 one-year periods. These models included the following time-varying (calendar year-

243 specific) covariates: the female's age, her dominance index, the average number of  
244 individuals in her group, the proportion of time during that year that her mother was  
245 alive, and the number of adult daughters that she had.

246 Age: Focal female ages were assigned based on demographic records of births  
247 and deaths collected from 1990 – 2019. The ages of females who were born before  
248 1990 were estimated in part by retroactively comparing photos taken then with photos  
249 of known-aged females collected later in the study. In addition, we inferred  
250 reproductive histories via genetic maternity data. We assumed that the age of first birth  
251 for each mother was six years, and each mother had a two-year interbirth interval  
252 (Fedigan and Rose, 1995; Perry, 2012).

253 Average number of individuals in her group: This is the mean number of adult  
254 females, adult males, and immatures that resided in the female's group during the days  
255 when researchers spent at least six hours of observation with the group, averaged for  
256 the year.

257 Mother's presence: The proportion of the year that the female's mother was  
258 alive and co-resided with her. The measure varies from 0 to 1, where 1 indicates that  
259 the mother was alive and co-resident with the focal female for the entire year, and 0  
260 indicates that the mother died in some previous year.

261 Number of daughters: The number of daughters that a focal female had was  
262 very highly correlated with her age (0.72). To control for the effect of age on the  
263 number of daughters, we grouped all of the females that were the same age together  
264 and centered the number of daughters for each age group. For every age group we

265 subtracted the mean number of daughters for that age group to reduce the confounding  
266 between age and number of daughters. The resulting variable was not correlated with  
267 age ( $\sim 0$ ). This is equivalent to modeling an interaction between age and number of  
268 daughters, with age treated as a categorical variable.

269 Annual dominance index: The annual dominance index represents the proportion  
270 of group members that the female dominated, on average, that year. For each  
271 observation day that the female (the focal) resided in a social group, we identified all of  
272 the other co-resident individuals (alters). To assess whether the female was dominant to  
273 an alter on a particular day,  
274 we first identified the dominance interaction immediately preceding and following the  
275 day of interest for each focal-alter dyad. The total number of these interactions across  
276 all focal–alter dyads represents the number of opportunities for the focal to dominate  
277 someone. For each interaction, we identified that the focal individual was dominant if  
278 she was either the animal performing the supplanting, or being cowered at, or being  
279 avoided, or fled from. The daily dominance index,  $DDI_i$ , of a focal individual,  $i$ , is a sum of  
280 dominance interactions where focal was dominant to their alters,  $w_{i-a}$ , divided by the  
281 total number of dominance interactions that the focal had with her alters,  $s_{i-a}$ :

282

$$283 \quad DDI_i = \frac{\sum w_{i-a}}{\sum s_{i-a}}. \quad (1)$$

284

285 Then, the average annual dominance index,  $ADI_i$ , is an average of daily dominance  
286 indices:

287

288

$$ADI_i = \frac{1}{n} \sum_{i=1}^n DDI_i . \quad (2)$$

289

290 In some cases, either one or no dominance interactions were available for a focal-alter

291 dyad. As a result, the individuals who did not have dominance interactions with the

292 focal did not contribute to the calculation of the daily dominance index.

293 We included the covariates, because each of them is likely to influence

294 females' probability of survival. An adult female's probability of dying in a given year is

295 expected to increase with age (Archie et al. 2014; Brent et al. 2017). Females who live in

296 larger groups might experience greater survival rates due to reduced predation risks

297 (Sterk et al., 1997). Higher-ranking females possibly enjoy reduced mortality in

298 comparison to lower-ranking females due to their central position in the group

299 (Kalbitzer et al., 2017), which also reduces risks of predation. The presence of a mother

300 and/or adult daughters approximate female's close kin network benefits: Females who

301 have a more extensive kin network might experience reduced mortality (Brent et al.,

302 2017).

303 Having many covariates in the model can result in "included variable bias"

304 (McElreath, 2020) where predictors are not only causally influencing the outcome, but

305 also influencing each other. This can result in predictor induced statistical selection

306 within the model and manifest itself through misleading statistical, but not causal,

307 associations between the variables we are interested in (McElreath, 2020). A female's

308 rank and age are likely to influence how much the female participates in social

309 interactions. Females who reside in larger groups are likely to have different interaction  
310 networks in comparison to females in smaller social groups due to a larger number of  
311 social partners available (Archie et al., 2014). To check if the above assumed  
312 relationships justify the inclusion of all of the predictor variables in the model, we drew  
313 a directed acyclical graph (DAG) using the package *daggity* (v.3.0) and analyzed implied  
314 functional relationships. The DAG assumed is provided in the supplemental materials.

### 315 *Modeling approach*

316 To take into account that some females contributed different numbers of  
317 years to the analysis, we modeled individual differences using a random effect term.  
318 Models were run using Stan (v.2.19.1) and the *rethinking* package (v. 1.93: McElreath  
319 2020) in R (v. 3.6.2; R Core Team 2019).

320 More formally, we specified the following model for the number of days  
321 before death,  $D_i$ . The probability for the number of days before death come from the  
322 cumulative probability distribution:

323

$$324 \quad \Pr(D_i | \lambda_i) = \lambda_i \exp(-\lambda_i D_i) . \quad (3)$$

325

326 For females who did not die during the observation period, the probability of waiting  $D_i$   
327 without dying comes from the complementary cumulative probability distribution:

328

$$329 \quad \Pr(D_i | \lambda_i) = \exp(-\lambda_i D_i) . \quad (4)$$

330

331 We model the rate of dying,  $\lambda_i$ , as follows

332 
$$\lambda_i = 1/\mu_i . \quad (5)$$

333 where  $\mu_i$  is the expected number of days till death

334 
$$\log(\mu_i) = \alpha + a[id] + b_{sociality} * true\ sociality\ estimate[id] + b_{rank} * rank_s \quad (6)$$

335 
$$+ b_{age} * age + b_{daughters} * daughters$$

336 
$$+ b_{mother} * mother + b_{grsize} * group\ size .$$

337

338  $\alpha$  denotes the intercept or the base rate of number of days survived,  $\alpha[id]$  denotes

339 individual female random effects corresponding to the observation period. The model

340 coefficients  $b_{sociality}$ ,  $b_{rank}$ ,  $b_{age}$ ,  $b_{daughters}$ ,  $b_{mother}$ ,  $b_{grsize}$  describe the impact of

341 sociality, rank, age, number of daughters, mother's presence, and group size,

342 respectively. We took a latent variable approach to model the sociality estimates, since

343 individual sociality estimates are not point estimates, but rather posterior distributions

344 with mean and SD reflecting measurement uncertainty about the true rate. Under this

345 approach, we assumed that each female had some true underlying sociality measure,

346 *true sociality estimate[id]*, which was normally distributed with mean and SD equal to

347 the mean and SD of the individual estimate of sociality drawn from the Social Relations

348 Model results.

349 We used the Bayesian approach to fit Cox proportional hazard model (Singer

350 and Willett 2003). We assumed Normal (8, 0.5) prior for a base rate of survival,  $\alpha$ , which

351 places most of the prior mass between 0 to 20 years with the mean of 8 years and a

352 long tail allowing more extreme values. For fixed effects, we assumed Normal (0, 1)



353 prior. For individual-level random effects,  $\alpha[id]$ , we compared three types of models:  
354 one with no random effects and two with individual-level random effect priors assumed  
355 as Normal (0, 0.2) or Normal (0, 1). All three model types resulted in similar estimates;  
356 therefore here we are reporting the results with individual-level random effect prior  
357 Normal (0, 1), while the results of the other two types of models are reported in the  
358 supplemental material (Table S1 and Table S2). All of the covariates, except the number  
359 of daughters, were standardized by subtracting the mean and dividing it by the standard  
360 deviation. As noted previously, the number of daughters was centered by subtracting  
361 the mean number of daughters for each age.

362

## 363 RESULTS

364 (1) Measures of sociality: How do adult females compare to the rest of the population?

365 Females differ the most from the other age-sex classes in their distribution of  
366 *grooming giving* measures. A majority of the females (80%) groom more than an  
367 average monkey in the population, while a majority of the adult males and immatures  
368 (78%) groom less than an average monkey (Figure 1, panel A). The female distributions  
369 for the rest of the behavioral domains are very similar to the other age-sex distributions,  
370 indicating that females behave similarly to adult males and immatures in those domains.

371 Figure 1 illustrates how the individual sociality measures of *grooming*,  
372 *coalitional support*, and *foraging in proximity* by adult females compare to the  
373 estimates for other age-sex classes. The distribution in orange represents adult female  
374 posterior means estimated by the Social Relations Model, while the distribution in white

375 represents a combination of adult males and immature capuchins. The zero represents  
376 an average individual in the population.

377 Grooming behavioral domain distributions show both the greatest and the  
378 smallest amount of variation. Females display the greatest range in *grooming giving*  
379 posterior estimates (*grooming giving* variance=2.02), and the narrowest range in  
380 *grooming receiving* posterior estimates (*grooming receiving* variance=0.12). The  
381 difference in variation suggests that the most avid groomers and the least enthusiastic  
382 groomers differ a lot from an average monkey. However, as recipients of grooming,  
383 both females who receive the most and the least amount of grooming are much more  
384 similar to an average monkey in the population in comparison to any other type of  
385 interaction that we measured.

386

387

388

389

390

391

392

393

394

395

396

397 **Figure 1.** Posterior mean distributions of annual individual sociality measures for each  
398 type of behavior. The orange density represents adult females whereas the white  
399 density represents the rest of the population. The population base rate is at  
400 approximately zero.  
401

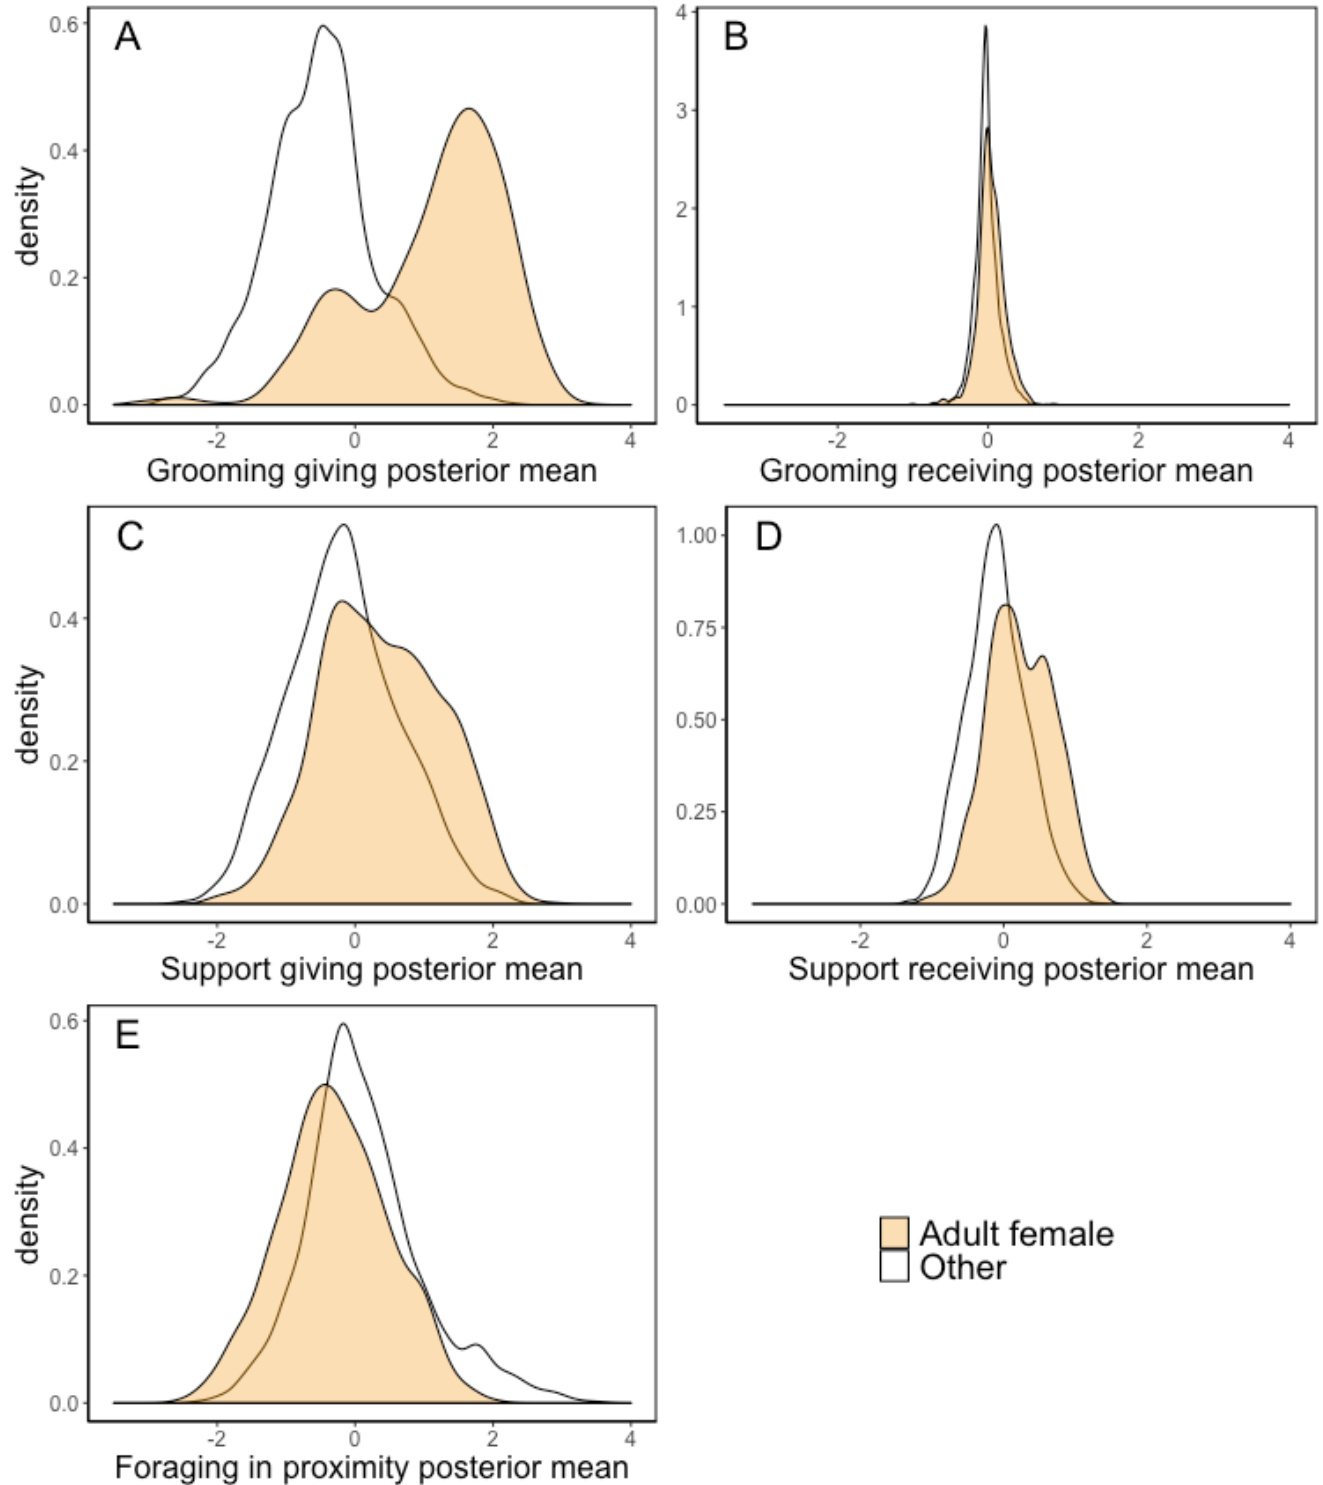

402

403 (2) Measure of sociality: Do females behave similarly across the behavioral domains?

404           Each female has five annual sociality measures. We plotted the pairwise  
405 correlations between each of the sociality measures in Figure 2 in order to investigate if  
406 female profiles are similar across all five measures, i.e. is a frequent groomer also a  
407 frequent recipient of grooming and coalitional support? Within the coalitional  
408 aggression domain, estimates of female giving and receiving coalitional support were  
409 highly correlated ( $r=0.97$ ). Females who intervene on someone's side during a conflict  
410 also tend to receive a lot of support from others. This suggests that there is a small  
411 subset of females that participate in coalitional aggression more frequently than  
412 others. However, females vary less in their *support receiving* than in their *support giving*  
413 estimates (Figure 1, Panel C–D). In the grooming domain, the correlation between giving  
414 and receiving estimates was moderate ( $r=0.57$ ). Some of the females who groom others  
415 the most are not among those who receive the most grooming. In addition, Figure 1  
416 panel B shows a narrow distribution of the receiving measurements, which implies that  
417 females overall distribute their grooming evenly among their group members.

418           The correlation across behavioral domains is smaller than within a domain,  
419 between 0.15 and 0.37: If a female is among those who engage a lot in coalitional  
420 aggression, she is not necessarily involved a lot in grooming interactions and in foraging  
421 in close proximity. The pairwise correlations show that females have different profiles of  
422 interactions depending on the behavioral domain.

423

424

425 **Figure 2.** Bi-variate correlations of individual sociality measures. Each point represents  
426 an annual observation of an individual female.

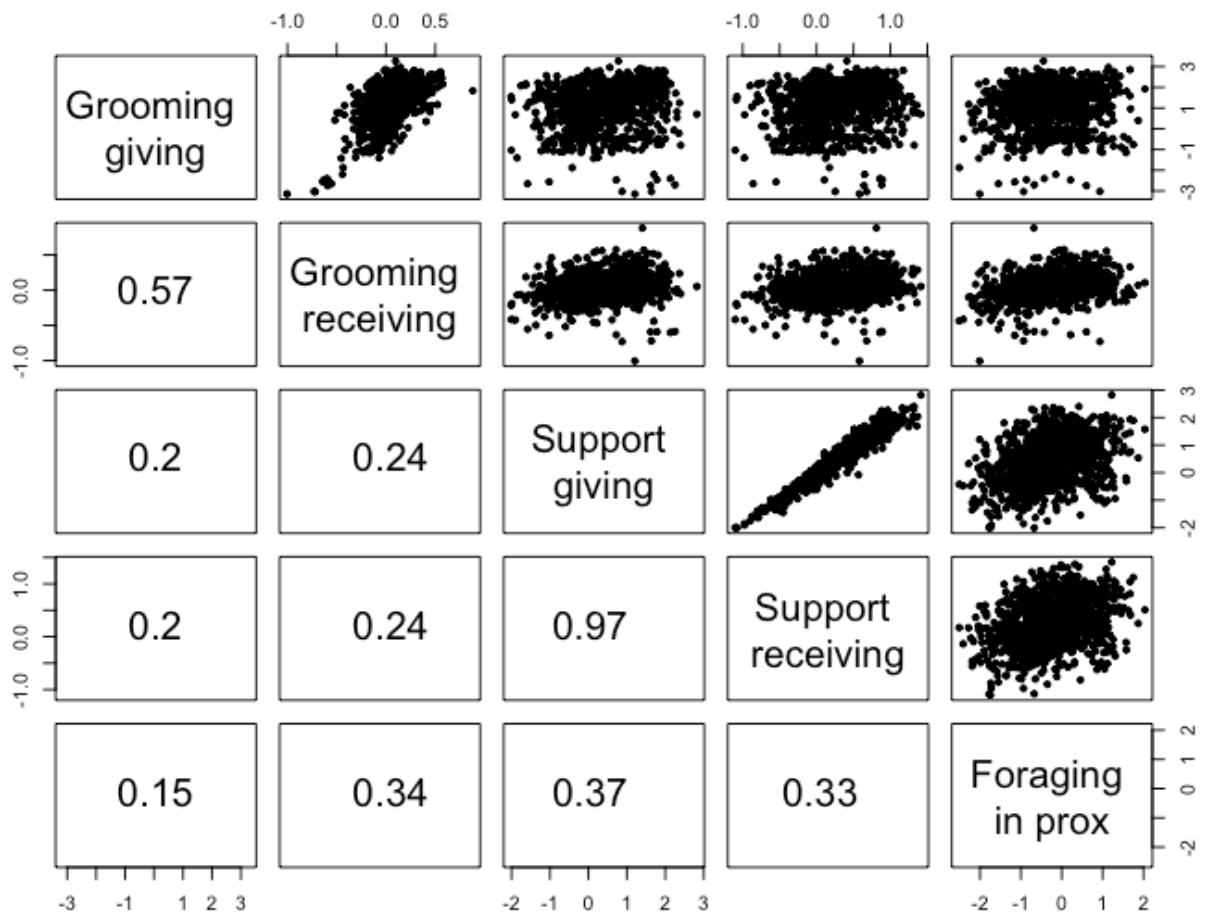

427

428 (3) Do more social females survive better?

429 Table 1 presents the Cox proportional hazards model posterior mean estimates

430 and the 95% Highest Posterior Density Interval (HPDI), representing the narrowest

431 interval containing the 95% probability mass. Independent of the effects of covariates

432 (age, dominance rank, group size, number of adult daughters, co-residence with

433 mother), females who groomed others more survived at higher rates than other

434 females. The other sociality measures had mean estimates consistent with sociality

435 predicting greater survival, but their HPDI intervals were wide and included zero

436 indicating that the models are uncertain about these estimates.

437

438 **Table 1.** Estimates of fixed effects of each of the Cox proportional hazards models:  
439 posterior means and 95% HPDI.

| Parameter          | Sociality measure   |                     |                     |                     |                       |
|--------------------|---------------------|---------------------|---------------------|---------------------|-----------------------|
|                    | Grooming giving     | Grooming receiving  | Support giving      | Support receiving   | Foraging in proximity |
| Intercept          | 9.20 [8.86,9.56]    | 9.13 [8.78,9.52]    | 9.07 [8.74,9.42]    | 9.06 [8.73,9.41]    | 9.08 [8.74,9.42]      |
| $\beta$ sociality  | 0.49 [0.26,0.70]    | 0.19 [-0.09,0.45]   | 0.11 [-0.21,0.45]   | 0.06 [-0.28,0.40]   | 0.16 [-0.18,0.47]     |
| $\beta$ rank       | -0.20 [-0.51,0.11]  | -0.11 [-0.45,0.24]  | -0.10 [-0.45,0.24]  | -0.10 [-0.47,0.28]  | -0.16 [-0.54,0.23]    |
| $\beta$ age        | -0.57 [-0.88,-0.25] | -0.66 [-0.96,-0.37] | -0.66 [-0.96,-0.37] | -0.68 [-0.99,-0.38] | -0.69 [-0.98,-0.39]   |
| $\beta$ daughters  | -0.08 [-0.45,0.28]  | -0.08 [-0.45,0.31]  | -0.07 [-0.44,0.31]  | -0.06 [-0.43,0.30]  | -0.05 [-0.43,0.32]    |
| $\beta$ mother     | 0.26 [-0.09,0.63]   | 0.31 [-0.02,0.66]   | 0.33 [-0.01,0.67]   | 0.32 [-0.01,0.65]   | 0.33 [-0.01,0.66]     |
| $\beta$ group size | 0.19 [-0.1,0.49]    | 0.18 [-0.10,0.46]   | 0.19 [-0.10,0.48]   | 0.18 [-0.1,0.46]    | 0.18 [-0.09,0.46]     |

440

441

442 We plotted the posterior means and their standard errors across five Cox

443 proportional hazard models in Figure 3 to better illustrate how model estimates

444 compare across all five models. Apart from sociality, all of the covariates have mean

445 estimates with wide HPDI intervals that include zero. The only exception is age,

446 indicating that female survival declines with age.

447

448

449

450

451 **Figure 3.** Posterior means and standard deviations of 5 Cox proportional hazards models  
452 in which annual survivorship varied as a function of five measures of sociality (*foraging*  
453 *in proximity, support receiving, support giving, grooming receiving, and grooming giving*)  
454 and covariates.

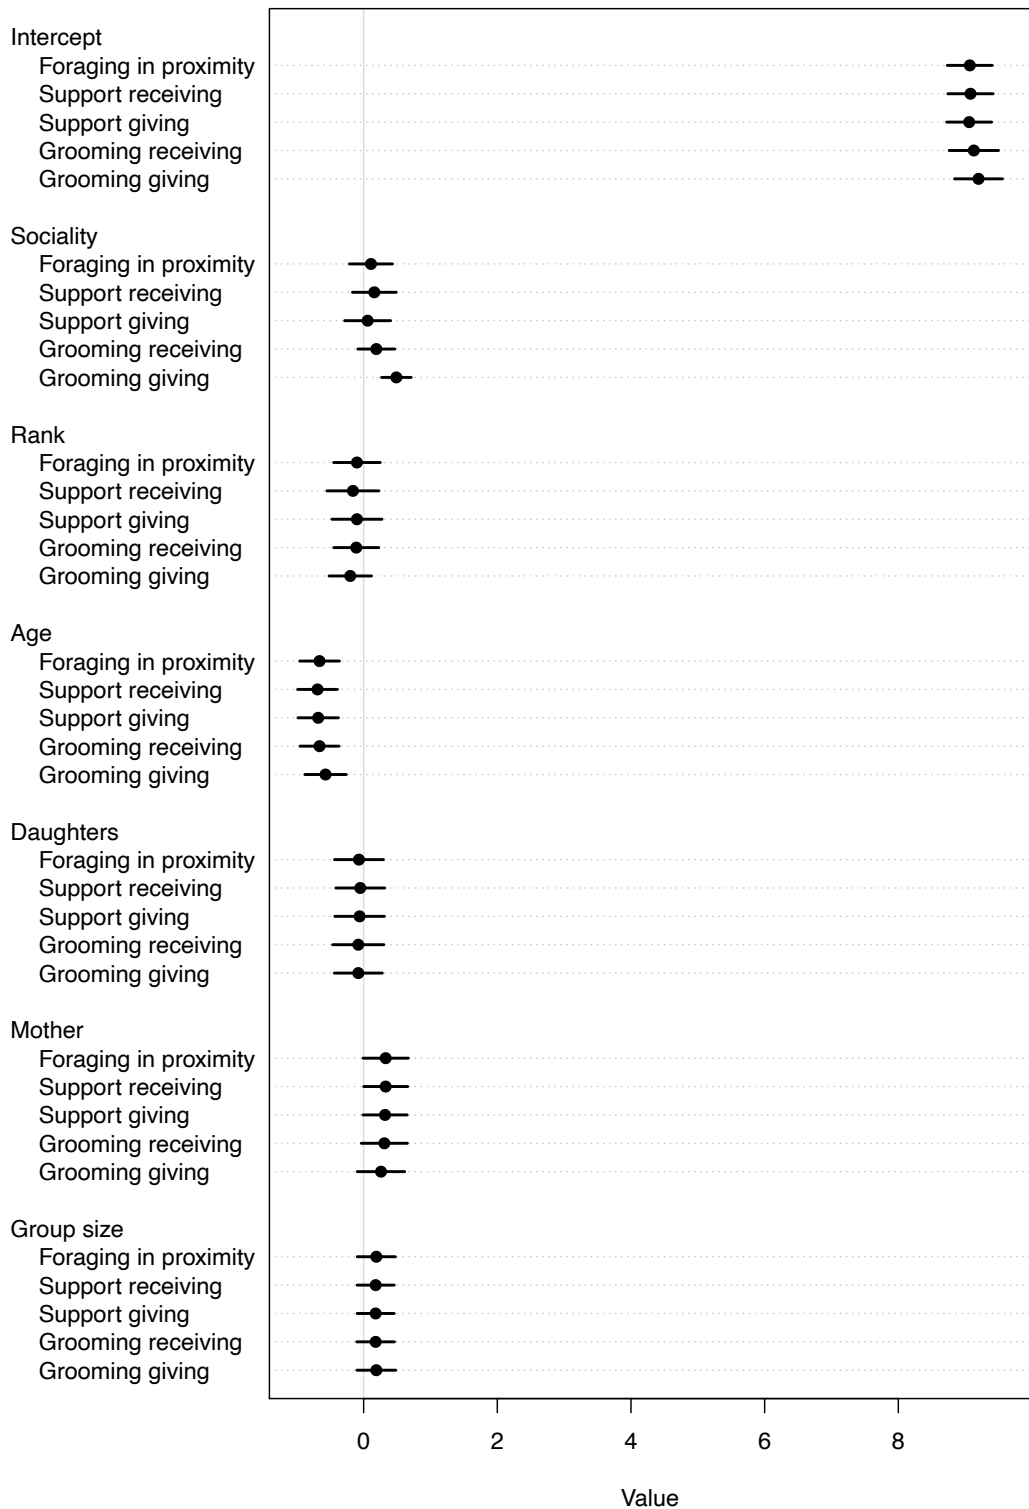

456 To facilitate the interpretation of the Cox proportional hazards model  
457 coefficients, we plotted model predictions showing the probability of dying in a given  
458 year (Figure 4). We have varied females' sociality measure to compute the predictions.  
459 Figure 4 illustrates the annual probability of dying as a function of a female's sociality  
460 level measure where a yellow line represents a 10-year-old female and a blue line  
461 represents a 30-year-old female (holding all other covariates fixed at the values  
462 described above).

463 Across all five sociality measures, the less social females have a greater  
464 probability of dying than more social females, but only the slopes for *groom giving*  
465 confidently suggest a beneficial effect on survivorship (Figure 4, panel A). Predictions for  
466 *groom receiving* likewise suggest a beneficial effect of sociality, but the model  
467 predictions are less certain (Figure 4, panel B). Meanwhile, the slopes for *coalitionary*  
468 *support* and *foraging in close proximity* are quite shallow, indicating that the survival  
469 varies little as a function of these sociality measures (Figure 4, panels C, D, and E). These  
470 model predictions reflect the uncertainty associated with these estimates (Table 1 and  
471 Figure 3). Overall, there is less certainty in the estimates for older females, partly owing  
472 to their scarcity in the sample.

473

474

475

476

477



478 **Figure 4.** Cox proportional hazard model predicted annual probabilities of dying at two  
479 representative ages (10 and 30) as a function of the sociality levels in five behavioral  
480 domains. For both ages, we assumed median group size, median rank, and average  
481 number of daughters for the age. For 10-year-old females, we assumed a co-resident  
482 mother, while predictions for the 30-year-old assume the mother is deceased.  
483

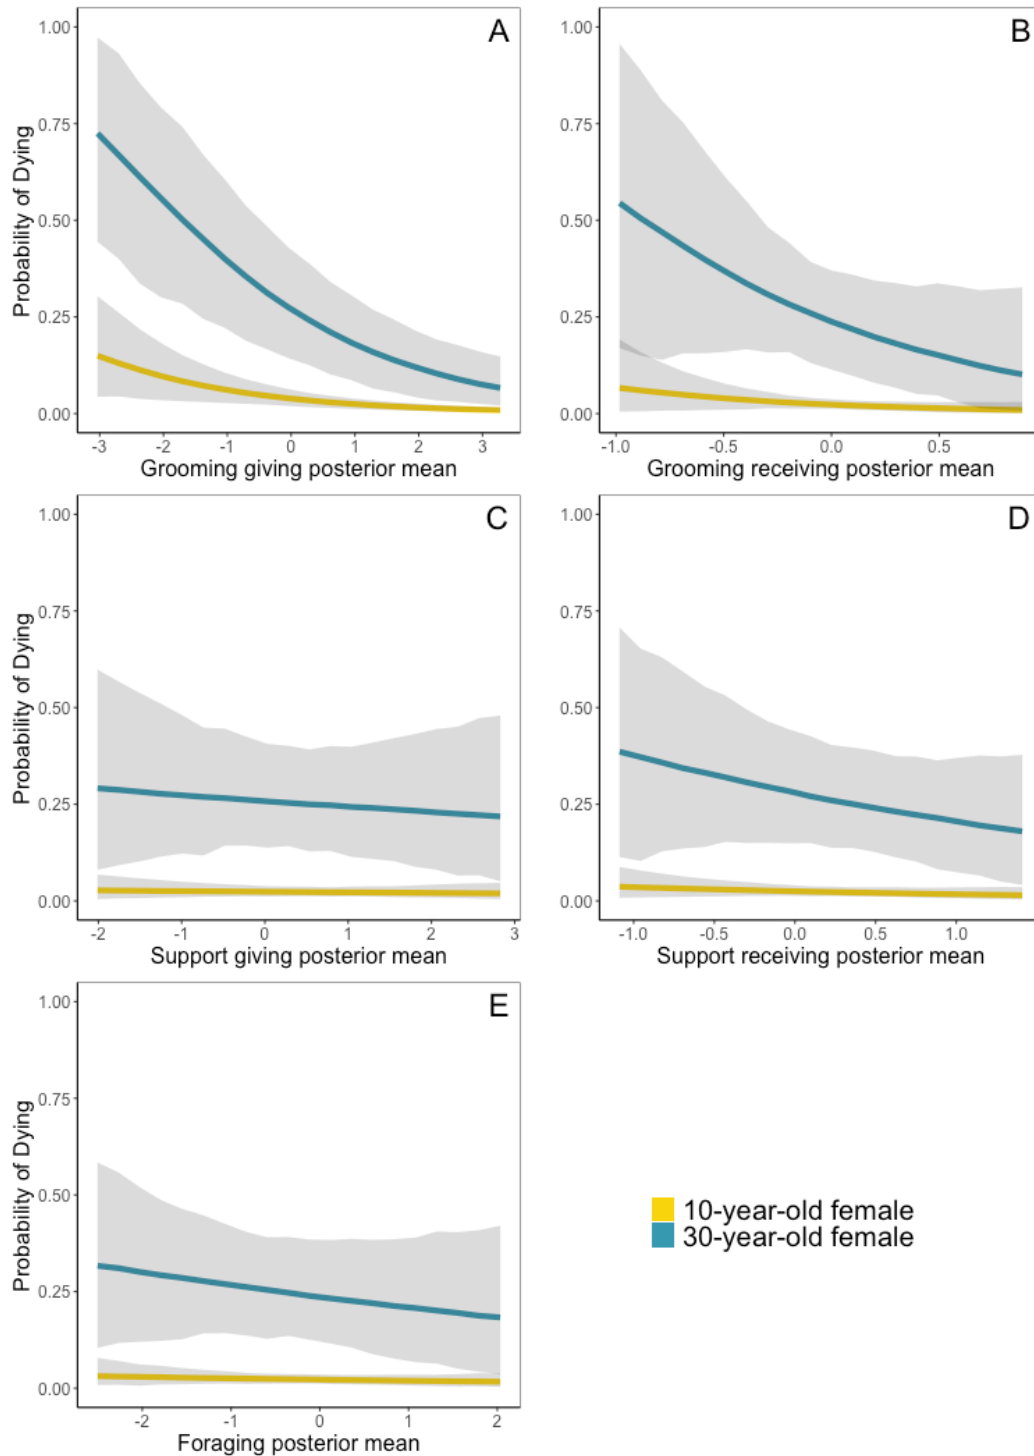

485 DISCUSSION

486 In female white-faced capuchin monkeys, providing grooming to others is  
487 associated with greater survival rates. Females who provide more grooming die at lower  
488 rates than females who engage in this behavior less often. By contrast, there was no  
489 strong evidence that females who receive more grooming, participate more often in  
490 coalitionary aggression, and forage more often in close proximity of others also have  
491 higher survivorship. Our results in the grooming domain are consistent with findings  
492 that social integration is associated with longevity in humans (Holt-Lunstad et al., 2010)  
493 and adds a neotropical primate species to the list of mammalian species where a similar  
494 association between sociality and longevity has been demonstrated (Silk et al., 2010;  
495 Archie et al., 2014; Brent et al., 2017; Yee et al., 2008; Nuñez et al., 2014; Fagen &  
496 Fagen, 2004).

497 Despite great interest by primatologists in studying social relationships and their  
498 impact on primate lives, there is no established consensus on how to measure the  
499 properties of social relationships in primates (Silk et al., 2013). The conceptual  
500 foundation for studying primate social relationships dates back to Robert Hinde's  
501 seminal paper (1976), where he argued that analyses of multiple types of interactions  
502 should be included in measuring social relationships. However, the details of how to  
503 combine these interactions into a meaningful measure have been under-theorized.  
504 There are some well-established measures that combine the rates of behaviors from  
505 different domains into a single measure of sociality (reviewed in Silk, 2013), but the

506 implications of averaging over multiple rates of different behaviors have not been  
507 analyzed.

508         We do not suggest that combining information about interactions from multiple  
509 domains should not be our goal in principle, but we want to draw attention to the idea  
510 that doing so imposes inferential tradeoffs. For example, we demonstrated that the  
511 distributions of the rates for each interaction type are very different (Figure 1) and, for  
512 example, the females who frequently groom others are not always the same females  
513 who frequently participate in coalitionary aggression (Figure 2). Averaging estimates  
514 across all five behaviors would result in the same point estimates for females who have  
515 very different profiles. For example, it is possible that a female who is an avid groomer  
516 and seldom participates in coalitionary aggression through simple averaging could  
517 appear identical to a female who rarely grooms others, but who often joins coalitionary  
518 aggression. The interpretation of such measures is problematic because sociality indices  
519 that draw on multiple behaviors may conceal important differences between  
520 individuals. We suggest that it is useful to understand the variation of these behaviors  
521 within a population before constructing a single measure.

522         We selected three behavioral domains, each of which represents a different  
523 type of social engagement in capuchins – grooming, coalitionary conflicts, and foraging –  
524 and estimated the individual sociality measures separately. We argue that doing so: (1)  
525 enabled us to incorporate the uncertainty about our measures, and (2) aided our  
526 interpretation of the results.

527            *Incorporating the uncertainty.* One of the challenges in analyzing observational  
528 longitudinal datasets is data resolution as a result of uneven sampling. Data from the  
529 natural habitats are notoriously difficult to gather. Inevitably, the records for social  
530 interactions are sparse (Farine 2015) and some individuals are observed more often  
531 than others for multiple reasons (Silk et al., 2013). Analysts therefore face a high risk of  
532 false negatives when estimating dyadic relationships, i.e. some pairs are inferred to  
533 have no social relationship at all, whereas if behavioral sampling were sufficiently dense,  
534 they would be observed to interact, although rarely (Farine, 2015).

535            To address the uneven sampling of individuals and social groups in our dataset,  
536 we used a Social Relations Model (Snijders and Kenny, 1999). This approach allowed us  
537 to estimate individual rates of giving and receiving interactions and the uncertainty  
538 associated with those estimates due to the varying number of observations. To increase  
539 data resolution, we did not focus on adult female interactions with only other adult  
540 females (e.g. Silk et al., 2010; Kalbitzer et al., 2017; Archie et al., 2014) or with only adult  
541 males (e.g. Archie et al., 2014). We used to use each female's entire observation history  
542 with her group members to ensure as complete as possible a picture of a female's true  
543 sociality (Farine and Whitehead, 2015). As a multilevel model (McElreath 2020), the  
544 Social Relations Model takes advantage of partial pooling across the entire population  
545 when estimating individual female estimates (McElreath, 2020), which reduces  
546 overfitting on the available data. To reflect the latent uncertainty in observational data,  
547 our sociality measures were modeled as distributions, rather than point estimates,  
548 which we subsequently used to model female survival.

549            *Interpretation of results.* Our analysis reveals several insights about grooming,  
550 coalitionary support, and foraging interactions by showing how adult females compare  
551 to each other and to the rest of the population (Figures 1–2). The most informative  
552 behavior is grooming. Adult females are the most avid groomers in the capuchin  
553 population with the majority of the females grooming more than an average monkey.  
554 However, some of the individuals who groom the least are also adult females.

555            Knowing how an individual female’s measures in one behavior correlate with  
556 other behaviors that same year provides additional insights into the heterogenous  
557 effects that the respective sociality measures exhibit on survivorship. As noted,  
558 *grooming giving* measures are reliably associated with longevity. Yet, because *grooming*  
559 *giving* is only weakly correlated with *support in coalitionary aggression* and *foraging in*  
560 *close proximity*, females who are providing the most grooming are usually not the same  
561 females who participate most often in coalitionary aggression or most often foraging in  
562 close proximity of others.

563            Within the grooming domain, our results make sense in light of the respective  
564 grooming distributions (Figure 1). *Grooming giving* and *grooming receiving* are  
565 moderately correlated ( $r = 0.57$ , Figure 2), suggesting that many females occupy a  
566 similar position relative to other females within the grooming network when quantifying  
567 their grooming rates with other group members. However, there is substantially more  
568 variation in how much grooming females provide, i.e. the most and the least avid  
569 groomers are much more different from an average monkey in the population than the  
570 females who receive the most and the least grooming. The narrow distribution of groom

571 receiving estimates suggests that grooming is somewhat equally distributed within the  
572 population and that individuals do not differ from each other a lot in how likely they are  
573 to be groomed by a group member. Unsurprisingly, these relatively small differences are  
574 not reliably associated with survival.

575         Finally, a biologically interesting question deals with the mechanisms that  
576 facilitate the relationship between sociality and longevity. Recently there has been a call  
577 for understanding exactly how sociality is affecting fitness in primates (Ostner and  
578 Schülke 2018; Thompson, 2019). Individual sociality as a construct is likely to be  
579 composed of the many types of relationships that an animal has: affiliative, agonistic  
580 and others. The lifespans that we observe are a consequence of many decisions that  
581 animals make and there is arguably more than one pathway through which sociality can  
582 affect survival in a particular species (Ostner & Schülke, 2018; Thompson, 2019).  
583 Behaviors such as grooming, coalitionary support and foraging in proximity of others  
584 indicate social relationships that individuals cultivate, but are probably not the sole  
585 indicators of those relationships.

586         Our study was not designed with the purpose of identifying a mechanism linking  
587 sociality and longevity. It is possible that females derive direct benefits from grooming  
588 others, such as social bonding through the release of hormones (Dunbar 2010).  
589 Indirectly, grooming interactions might contribute to structuring a female's overall social  
590 life. Capuchin monkeys spend a lot of time grooming, and providing grooming to  
591 multiple partners might allow females to develop social relationships which eventually  
592 structure other types of interactions. For example, the distributions of coalitionary

593 aggression interactions suggest that a small group of individuals participate in  
594 coalitionary aggression because female estimates of giving and receiving support are  
595 very highly correlated (Figure 2). Since the females who groom others the most are  
596 usually not the same females who participate in coalitionary aggression the most, it is  
597 possible that the frequent groomers experience less aggression and, as a result, fewer of  
598 the detrimental consequences associated with it. Alloparenting might be another  
599 domain where frequent groomers receive more help from other group members. To  
600 better understand the mechanisms that contribute to the relationship between sociality  
601 and longevity and to design studies to test them, we need to investigate the interaction  
602 patterns themselves. Understanding the natural structure of different types of  
603 interaction types can help in developing better sociality measures and further our  
604 understanding how sociality contributes to fitness.

#### 605 DATA AND CODE ACCESSIBILITY

606 The data and code used to produce the analyses in this paper are available at:

607 [www.doi.org/10.5281/zenodo.3961479](http://www.doi.org/10.5281/zenodo.3961479)

608

#### 609 ACKNOWLEDGEMENTS

610 The following field assistants contributed significant amounts of data to the Lomas  
611 Barbudal Monkey Project dataset: C. Angyal, A. Autor, B. Barrett, L. Beaudrot, M.  
612 Bergstrom, R. Berl, A. Bjorkman, L. Blankenship, T. Borcuch, J. Broesch, D. Bush, J. Butler,  
613 F. Campos, C. Carlson, A. Cobden, M. Corrales, J. Damm, B. Davis, C. deRango, N. Donati,  
614 C. Dillis, G. Dower, R. Dower, A. Duchesneau, K. Feilen, J. Fenton, S. Fiello, K. Fisher, A.

615 Fuentes J., M. Fuentes A., T. Fuentes, C. Gault, H. Gilkenson, I. Godoy, I. Gottlieb, J.  
616 Griçute, L.M. Guevara R., L. Hack, R. Hammond, S. Herbert, C. Hirsch, M. Hoffman, A.  
617 Hofner, C. Holman, J. Hubbard, S. Hyde, M. Jackson, O. Jacobson, E. Johnson, L. Johnson,  
618 S. Lee, S. Leinwand, T. Lord, M. Kay, E. Kennedy, D. Kerhoas-Essens, E. Johnson, S.  
619 Kessler, B. Krimmel, W. Lammers, S. Lopez, S. MacCarter, J. Mackenzie, M. Mayer, F.  
620 McKibben, W. Meno, A. Mensing, M. Milstein, C. Mitchell, Y. Namba, A. Neyer, C.  
621 O'Connell, J. C. Ordoñez, J., N. Parker, B. Pav, R. Popa, K. Potter, K. Ratliff, K. Reinhardt,  
622 N. Roberts Buceta, E. Rothwell, J. Rottman, H. Ruffler, S. Sanford, M. Saul, E. Seabright, I.  
623 Schamberg, S. Schembari, N. Schleissman, C. Schmitt, S. Schulze, A. Scott, S. Sita, J. Shih,  
624 K. Stewart, W. Tucker, E. Urquhart, K. van Atta, J. Vandermeer, L. van Zuidam, J. Verge,  
625 V. Vonau, A. Walker-Bolton, E. Wikberg, E. Williams, L. Wolf, and D. Wood. We thank H.  
626 Gilkenson and W. Lammers for long-term management of the field site during 2002-  
627 2013. We thank the Costa Rican park service (Sistema Nacional de Áreas de  
628 Conservación and Área de Conservación Tempisque), Hacienda Pelon de la Bajura,  
629 Hacienda Brin D'Amor, and the residents of San Ramon de Bagaces for permission to  
630 work on their land. K.K. was supported by a University of California-Los Angeles (UCLA)  
631 Pauley Fellowship, a UCLA Dissertation Year Fellowship, and by the Max Planck Institute  
632 for Evolutionary Anthropology. This material is based on data collection supported by  
633 funding provided to S.E.P. by the National Science Foundation (under grant numbers  
634 1638428, 0613226, 0848360, and 1232371), the Max Planck Institute for Evolutionary  
635 Anthropology, the L.S.B. Leakey Foundation (5 grants), the National Geographic Society  
636 (5 grants), the Templeton World Charity Foundation (grant #0208), the Wild Capuchin



637 Foundation, and multiple Committee on Research grants from UCLA. D. Cohen assisted  
638 with database management and queries. This paper has benefited from helpful  
639 discussions with H. C. Barrett, D. Cohen, J. Manson, and M.B. McElreath.

640

641

642

643

644

645

646

647

648

649

650

651

652

653

654

655

656

657

658

659 REFERENCES

- 660 Archie, E. A., Tung, J., Clark, M., Altmann, J., & Alberts, S. C. (2014). Social affiliation  
661 matters: Both same-sex and opposite-sex relationships predict survival in wild  
662 female baboons. *Proceedings of the Royal Society B: Biological Sciences*,  
663 *281*(1793), 20141261.
- 664 Blumstein, D. T., Williams, D. M., Lim, A. N., Kroeger, S., & Martin, J. G. (2018). Strong  
665 social relationships are associated with decreased longevity in a facultatively  
666 social mammal. *Proceedings of the Royal Society B: Biological Sciences*,  
667 *285*(1871), 20171934.
- 668 Brent, L. J. N., Ruiz-Lambides, A., & Platt, M. L. (2017). Family network size and survival  
669 across the lifespan of female macaques. *Proceedings of the Royal Society B:*  
670 *Biological Sciences*, *284*(1854), 20170515.
- 671 Clutton-Brock, T. H. (1988). *Reproductive success: Studies of individual variation in*  
672 *contrasting breeding systems*. University of Chicago Press.
- 673 Dunbar, R. I. M. (2010). The social role of touch in humans and primates: Behavioural  
674 function and neurobiological mechanisms. *Neuroscience & Biobehavioral*  
675 *Reviews*, *34*(2), 260–268. <https://doi.org/10.1016/j.neubiorev.2008.07.001>
- 676 Fagen, R., & Fagen, J. (2004). Juvenile survival and benefits of play behaviour in brown  
677 bears, *Ursus arctos*. *Evolutionary Ecology Research*, *6*(1), 89–102.
- 678 Farine, D. R. (2015). Proximity as a proxy for interactions: Issues of scale in social  
679 network analysis. *Animal Behaviour*, *104*, e1–e5.

- 680 Farine, D. R., & Whitehead, H. (2015). Constructing, conducting and interpreting animal  
681 social network analysis. *Journal of Animal Ecology*, *84*(5), 1144–1163.
- 682 Fedigan, L. M., Carnegie, S. D., & Jack, K. M. (2008). Predictors of reproductive success in  
683 female white-faced capuchins (*Cebus capucinus*). *American Journal of Physical*  
684 *Anthropology*, *137*(1), 82–90.
- 685 Fedigan, L. M., & Rose, L. M. (1995). Interbirth interval variation in three sympatric  
686 species of neotropical monkey. *American Journal of Primatology*, *37*(1), 9–24.  
687 <https://doi.org/10.1002/ajp.1350370103>
- 688 Fragaszy, D. M., Visalberghi, E., & Fedigan, L. M. (2004). *The complete capuchin: The*  
689 *biology of the genus Cebus*. Cambridge University Press.
- 690 Gilby, I. C., Brent, L. J., Wroblewski, E. E., Rudicell, R. S., Hahn, B. H., Goodall, J., & Pusey,  
691 A. E. (2013). Fitness benefits of coalitionary aggression in male chimpanzees.  
692 *Behavioral Ecology and Sociobiology*, *67*(3), 373–381.
- 693 Gros-Louis, J., Perry, S., & Manson, J. H. (2003). Violent coalitionary attacks and  
694 intraspecific killing in wild white-faced capuchin monkeys (*Cebus capucinus*).  
695 *Primates*, *44*(4), 341–346.
- 696 Hinde, R. A. (1976). Interactions, relationships and social structure. *Man*, 1–17.
- 697 Holt-Lunstad, J., Smith, T. B., & Layton, J. B. (2010). Social relationships and mortality  
698 risk: A meta-analytic review. *PLoS Medicine*, *7*(7), e1000316.
- 699 Kajokaite, K., Whalen, A., Panchanathan, K., & Perry, S. (2019). White-faced capuchin  
700 monkeys use both rank and relationship quality to recruit allies. *Animal*  
701 *Behaviour*, *154*, 161–169.

- 702 Kalbitzer, U., Bergstrom, M. L., Carnegie, S. D., Wikberg, E. C., Kawamura, S., Campos, F.  
703 A., Jack, K. M., & Fedigan, L. M. (2017). Female sociality and sexual conflict shape  
704 offspring survival in a Neotropical primate. *Proceedings of the National Academy  
705 of Sciences*, *114*(8), 1892–1897.
- 706 Koster, J., Leckie, G., Miller, A., & Hames, R. (2015). Multilevel modeling analysis of  
707 dyadic network data with an application to Ye'kwana food sharing. *American  
708 Journal of Physical Anthropology*, *157*(3), 507–512.
- 709 Koster, J., Leckie, G., & Aven, B. (2019). Statistical methods and software for the  
710 Multilevel Social Relations Model. *Field Methods*, 1525822X19889011.
- 711
- 712 Manson, J. H., Navarrete, C. D., Silk, J. B., & Perry, S. (2004). Time-matched grooming in  
713 female primates? New analyses from two species. *Animal Behaviour*, *67*(3), 493–  
714 500.
- 715 McElreath, R. (2020). *Statistical rethinking: A Bayesian course with examples in R and  
716 Stan*. CRC press.
- 717 McElreath, R. (2020). rethinking: Statistical rethinking book package (R package Version  
718 1.93). <https://github.com/rmcelreath/rethinking>.
- 719
- 720 Nuñez, C. M., Adelman, J. S., & Rubenstein, D. I. (2014). Sociality increases juvenile  
721 survival after a catastrophic event in the feral horse (*Equus caballus*). *Behavioral  
722 Ecology*, *26*(1), 138–147.

- 723 Ostner, J., & Schuelke, O. (2018). Linking sociality to fitness in primates: A call for  
724 mechanisms. In *Advances in the Study of Behavior* (Vol. 50, pp. 127–175).  
725 Elsevier.
- 726 Perry, S. (1996). Female-female social relationships in wild white-faced capuchin  
727 monkeys, *Cebus capucinus*. *American Journal of Primatology*, *40*(2), 167–182.
- 728 Perry, S. (2012). The behavior of wild white-faced capuchins: Demography, life history,  
729 social relationships, and communication. In *Advances in the study of behavior*  
730 (Vol. 44, pp. 135–181). Elsevier.
- 731 Perry, S., Godoy, I., & Lammers, W. (2012). The Lomas Barbudal Monkey Project: Two  
732 decades of research on *Cebus capucinus*. In *Long-term field studies of primates*  
733 (pp. 141–163). Springer.
- 734 Perry, S., Manson, J. H., & Perry, S. (2009). *Manipulative monkeys*. Harvard University  
735 Press.
- 736 Porter, C. A., Page, S. L., Czelusniak, J., Schneider, H., Schneider, M. P. C., Sampaio, I., &  
737 Goodman, M. (1997). Phylogeny and Evolution of Selected Primates as  
738 Determined by Sequences of the  $\epsilon$ -Globin Locus and 5' Flanking Regions.  
739 *International Journal of Primatology*, *18*(2), 261–295.  
740 <https://doi.org/10.1023/A:1026328804319>
- 741 R Core Team. (2020). R: A language and environment for statistical computing. Vienna,  
742 Austria: R Foundation for Statistical Computing.
- 743

- 744 Roelfs, D. J., Shor, E., Kalish, R., & Yogeve, T. (2011). The rising relative risk of mortality for  
745 singles: Meta-analysis and meta-regression. *American Journal of Epidemiology*,  
746 *174*(4), 379–389.
- 747 Schülke, O., Bhagavatula, J., Vigilant, L., & Ostner, J. (2010). Social bonds enhance  
748 reproductive success in male macaques. *Current Biology*, *20*(24), 2207–2210.
- 749 Shor, E., & Roelfs, D. J. (2015). Social contact frequency and all-cause mortality: A meta-  
750 analysis and meta-regression. *Social Science & Medicine*, *128*, 76–86.
- 751 Shor, E., Roelfs, D. J., & Yogeve, T. (2013). The strength of family ties: A meta-analysis and  
752 meta-regression of self-reported social support and mortality. *Social Networks*,  
753 *35*(4), 626–638.
- 754 Silk, J. B. (2009). Nepotistic cooperation in non-human primate groups. *Philosophical  
755 Transactions of the Royal Society B: Biological Sciences*, *364*(1533), 3243–3254.
- 756 Silk, J. B., Alberts, S. C., & Altmann, J. (2003). Social bonds of female baboons enhance  
757 infant survival. *Science*, *302*(5648), 1231–1234.
- 758 Silk, J. B., Beehner, J. C., Bergman, T. J., Crockford, C., Engh, A. L., Moscovice, L. R.,  
759 Wittig, R. M., Seyfarth, R. M., & Cheney, D. L. (2010). Strong and consistent social  
760 bonds enhance the longevity of female baboons. *Current Biology*, *20*(15), 1359–  
761 1361.
- 762 Silk, J., Cheney, D., & Seyfarth, R. (2013). A practical guide to the study of social  
763 relationships. *Evolutionary Anthropology: Issues, News, and Reviews*, *22*(5), 213–  
764 225.

765 Snijders, T. A., & Kenny, D. A. (1999). The social relations model for family data: A  
766 multilevel approach. *Personal Relationships*, 6(4), 471–486.

767 Stan Development Team. (2020). RStan: The R interface to Stan (Version 2.19.1).  
768

769 Sterck, E. H. M., Watts, D. P., & van Schaik, C. P. (1997). The evolution of female social  
770 relationships in nonhuman primates. *Behavioral Ecology and Sociobiology*, 41(5),  
771 291–309. <https://doi.org/10.1007/s002650050390>

772 Thompson, N. A. (2019). Understanding the links between social ties and fitness over  
773 the life cycle in primates. *Behaviour*, 1(aop), 1–50.

774 Thompson, N. A., & Cords, M. (2018). Stronger social bonds do not always predict  
775 greater longevity in a gregarious primate. *Ecology and Evolution*, 8(3), 1604–  
776 1614.

777 Yee, J. R., Cavigelli, S. A., Delgado, B., & McClintock, M. K. (2008). Reciprocal affiliation  
778 among adolescent rats during a mild group stressor predicts mammary tumors  
779 and lifespan. *Psychosomatic Medicine*, 70(9), 1050.

780
