1 Fitness benefits of providing services to others: Sociality predicts survival in a neotropical  
2 primate

3

4

5 Kotrina Kajokaite\*<sup>a</sup>, Andrew Whalen<sup>b</sup>, Jeremy Koster<sup>a,c</sup>, and Susan Perry<sup>d,e</sup>

6

7 a. Department of Human Behavior, Ecology and Culture, Max Planck Institute for Evolutionary  
8 Anthropology, Deutscher Platz 6, 04103 Leipzig, Germany

9 b. The Roslin Institute and Royal (Dick) School of Veterinary Studies, The University of  
10 Edinburgh, Easter Bush Campus, Midlothian EH25 9RG, UK

11 c. Department of Anthropology, University of Cincinnati, PO BOX 210380 481 Braunstein Hall,  
12 Cincinnati, OH 45221-0380, USA

13 d. Department of Anthropology, University of California, 375 Portola Plaza, Los Angeles, CA  
14 90095, USA

15 e. Behavior, Evolution and Culture Program, Department of Anthropology, University of  
16 California, 375 Portola Plaza, Los Angeles, CA 90095, USA

17

18

19

20 \* Corresponding author: Kotrina Kajokaite, Department of Human Behavior, Ecology and  
21 Culture, Max Planck Institute for Evolutionary Anthropology, Deutscher Platz 6 04103  
22 Leipzig, Germany

23 ABSTRACT

24 Across multiple species of social mammals, evidence is accumulating that sociality is associated  
25 with fitness. In long-lived species, like primates, lifespan is one of the main fitness components.  
26 Here, we provide the first direct evidence that females who provide more in social services live  
27 longer. We used 18 years of data from the Lomas Barbudal Monkey project to quantify sociality  
28 in 11 capuchin (*Cebus capucinus*) social groups using three interaction types: grooming, support  
29 in coalitionary aggression, and foraging in close proximity. We analyzed each domain separately  
30 to understand how giving and receiving social favors predict survivorship. To estimate female  
31 sociality in each of these domains, we implemented an adaptation of the Social Relations  
32 Model. This approach enabled us to estimate individual rates of giving and receiving  
33 interactions while accounting for the inherent measurement uncertainty in these estimates due  
34 to varying amounts of observations of each individual. Subsequently, we modeled adult  
35 females' survival as a function of their sociality estimates, rank, age, group size, and maternal  
36 kin presence using a Bayesian Cox proportional hazards model. We found that females who  
37 provide more grooming to other group members survive longer, but other social interaction  
38 types had little effect on survivorship.

39

40

41

42

43 Keywords: capuchins, *Cebus*, sociality, social relationships, survival, fitness

44

## 45 INTRODUCTION

46           A key question for understanding the evolution of animal sociality is: Do animals that  
47 are more social enjoy greater fitness benefits? A number of studies link components of  
48 reproductive success, such as fecundity (Fedigan et al., 2008; Schülke et al., 2010; Gilby et al.,  
49 2013) and offspring survival (Silk, 2009; Silk et al., 2003; Kalbitzer et al., 2017), to differences in  
50 the social behavior of individuals.

51           In long-lived, iteroparous species, lifespan is also an important component of  
52 reproductive success contributing to fitness variation (Clutton-Brock, 1998). In human  
53 populations, being socially connected is associated with a lower probability of dying (Holt-  
54 Lunstad et al., 2010; Shor and Roelfs, 2015; Shor et al., 2013), while having few and poor social  
55 relationships is associated with a higher risk of death (Roelfs et al., 2011). In nonhuman species  
56 there is similar evidence that various aspects of individual sociality are associated with lifespan  
57 (e.g., Silk et al. 2010).

58           Detailed longitudinal behavioral records are necessary for relating an individual's social  
59 behavior patterns to longevity (Clutton-Brock, 1988). Because these data are logistically difficult  
60 to collect in many habitats, the data are often challenging to analyze given heterogeneous  
61 sampling across time periods, social groups, and individuals. Although research on sociality  
62 often ignores this sampling variability (reviewed in Silk et al. 2013), the measurement  
63 uncertainty can be substantial, complicating inferences.

64           The primary objective of this paper is an investigation of the effects of sociality on  
65 survivorship among female white-faced capuchins (*Cebus capucinus*). We test this relationship  
66 using data spanning 18 years of capuchin monkeys' social interactions and demography from

67 the Lomas Barbudal Monkey dataset. To quantify individual sociality, we selected interactions  
68 from three domains to represent the variety of social behaviors that capuchin monkeys engage  
69 in: grooming, coalitionary aggression, and foraging in proximity to others. A secondary goal of  
70 the paper is to develop analytical approaches for the measurement uncertainty stemming from  
71 heterogenous sampling, which we address by adapting the multilevel Social Relations Model  
72 (Snijders and Kenny, 1999; Koster et al. 2020). We generate individuals' sociality estimates that  
73 reflect the measurement uncertainty, which are subsequently used to test the hypothesis that  
74 social behavior predicts longevity.

## 75 METHODS

### 76 *Study subjects and the dataset*

77 We studied members of the wild white-faced capuchin population at the Lomas  
78 Barbudal Biological Reserve and surrounding private lands in Guanacaste, Costa Rica (Perry et  
79 al., 2012). The dataset has longitudinal records including demographic information, pedigree  
80 information, and social interactions on individuals living in 11 capuchin social groups. The data  
81 on capuchin behavior were collected between January 2002 and December 2019. All groups in  
82 this study were observed in at least 7 calendar years (mean = 13.27). The primary subjects of  
83 this analysis were 132 adult females, where adulthood is assumed to begin at the age of 5  
84 years. The behavioral and demographic data on each group were collected by experienced  
85 observers during visits lasting at least 6 hours/day.

### 86 *Measuring Sociality*

87 As measures of female sociality, we focused on three behavioral domains: grooming,  
88 coalitionary aggression, and foraging. We treated grooming and coalition formation as directed

89 behaviors, and we used observations of individuals as both initiators and recipients of the  
90 behavior. We did not have information about which individual had initiated the proximity when  
91 foraging, and therefore foraging in proximity was treated as an undirected behavior. In  
92 calculating the frequency with which adult females engaged in these interactions, we used  
93 behavioral records from all the individuals who resided in the 11 respective groups during the  
94 study period. There were a total of 563 monkeys and 13,770 unique dyads. We treated each of  
95 the five interaction types (*grooming giving, grooming receiving, support giving, support*  
96 *receiving, forage in proximity*) as a separate measure of sociality.

#### 97 *Grooming (groom giving and groom receiving)*

98 Grooming rates were estimated using data collected during 10-minute focal follows. To  
99 estimate individual grooming rates, we calculated dyadic counts of grooming and dyadic  
100 opportunities for grooming. The opportunity for a dyad, A-B, to engage in grooming, was  
101 calculated as the sum of the focal follows of A and the focal follows of B at times when A and B  
102 were co-resident. A count of 1 was assigned if A groomed B at least once during a focal follow,  
103 otherwise 0 was assigned. The same was done when evaluating if B groomed A.

#### 104 *Joining a coalitionary conflict (support giving and support receiving)*

105 The behavior of joining a coalitionary conflict was defined as an individual intervening  
106 on one side during an ongoing aggressive conflict. This definition only indicates the functional  
107 aspect of joining a side; it entails no inferences about internal psychological states such as the  
108 intent to help a specific individual. Since aggressive interactions are salient and harder to miss  
109 than quiet activities like grooming, aggressive interactions were collected both *ad libitum* and  
110 during focal follows. The chronological stream of aggressive behaviors was divided into 5-

111 minute intervals. In order to identify instances of joining a coalitionary conflict, monkey A is  
112 identified as joining monkey B if A performed an aggressive behavior toward either monkey B's  
113 opponent or victim within the context of the intervals. The measure is dichotomous, and a  
114 single instance was recorded for the occasions when there were multiple observations of  
115 monkey A joining monkey B during the interval. To calculate the opportunities to join a  
116 coalitionary conflict, all individuals who were co-resident during the aggressive conflict were  
117 regarded as having the opportunity to join on either side during the conflict.

### 118 *Foraging in proximity*

119 *Foraging in close proximity* was estimated from group scans that occurred in the  
120 context of foraging. In group scans, the identity of the scanned individuals, their activity and  
121 their proximity to other individuals within 10 body lengths (~2 m) was noted. We considered  
122 individuals to be foraging in close proximity if they were scanned within 5 body lengths (~1m) of  
123 each other. For each dyad, we scored whether they were observed foraging within close  
124 proximity in 10-minute intervals. The number of opportunities that the dyad had to forage  
125 within close proximity is a sum of group scans in the foraging context that are 10 minutes apart,  
126 where one of the individuals is a subject of a group scan.

### 127 *Individual sociality measures*

128 The data for these analyses were collected across eighteen years and the number of  
129 observed social groups and individuals generally increased over time. As a result, the density of  
130 data is uneven across time periods, social groups, and individuals. We incorporated uneven  
131 distributions of the data by aggregating the data annually and using adaptations of the  
132 multilevel Social Relations Model (Snijders and Kenny, 1999; Koster et al. 2020) to estimate

133 individual annual rates of grooming, coalitionary support, and foraging (see supplemental  
134 material). This method provided estimates of individual sociality that reflect the measurement  
135 uncertainty, with the uncertainty increasing for infrequently observed individuals.

### 136 *Modeling survival as a function of individual sociality measure*

137 To investigate whether sociality is associated with adult female longevity, we used  
138 Bayesian Cox proportional hazards models. In separate models, each of the five individual  
139 sociality measures was modeled as a predictor of survival probability over one-year periods. In  
140 addition to the respective sociality measures, these models included the following time-varying  
141 (calendar year-specific) covariates: the female's age, her dominance rank (ranges from 0 to 1,  
142 where 1 represents the highest rank), the average number of individuals in her group, the  
143 proportion of time during that year that her mother was alive, and the number of adult  
144 daughters that she had (see supplemental material for further details on covariates).

### 145 *Modeling approach*

146 We specified the following model for the number of days before death,  $D_i$ . The  
147 probability for the number of days before death comes from the cumulative probability  
148 distribution:

149

$$150 \quad \Pr(D_i | \lambda_i) = \lambda_i \exp(-\lambda_i D_i) . \quad (3)$$

151

152 For females who did not die during the observation period, the probability of surviving  $D_i$   
153 comes from the complementary cumulative probability distribution:

154

155 
$$\Pr (D_i | \lambda_i) = \exp (-\lambda_i D_i) . \quad (4)$$

156

157 We model the rate of dying,  $\lambda_i$ , as follows:

158 
$$\lambda_i = 1/\mu_i . \quad (5)$$

159 where  $\mu_i$  is the expected number of days till death

160 
$$\log(\mu_i) = \alpha + a[id] + b_{sociality} * true\ sociality\ estimate[id] + b_{rank} * rank \quad (6)$$

161 
$$+ b_{age} * age + b_{daughters} * daughters$$

162 
$$+ b_{mother} * mother + b_{grsize} * group\ size .$$

163

164 where  $\alpha$  denotes the intercept or the base rate of number of days survived,  $\alpha[id]$  denotes

165 individual female random effects corresponding to the observation period. The model

166 coefficients  $b_{sociality}$ ,  $b_{rank}$ ,  $b_{age}$ ,  $b_{daughters}$ ,  $b_{mother}$ , and  $b_{grsize}$  describe the impact of

167 sociality, rank, age, number of daughters, mother's presence, and group size, respectively. We

168 adopted a latent variable approach to model the sociality estimates given that the individuals'

169 sociality estimates are not point estimates, but rather posterior distributions with means and

170 standard deviations that reflect the measurement uncertainty.

171 We used the Bayesian approach to fit Cox proportional hazards models (Singer and

172 Willett 2003). We assumed a Normal (8, 0.5) prior for a base rate of survival,  $\alpha$ , which places

173 most of the prior mass between 0 to 20 years with the mean of 8 years and a long tail allowing

174 more extreme values. For fixed effects, we assumed Normal (0, 1) priors. For individual-level

175 random effects,  $\alpha[id]$ , we use a Normal (0, 1) prior (see supplemental material). All of the

176 covariates, except the number of daughters, were standardized by subtracting the mean and



177 dividing it by the standard deviation. The number of daughters was centered by subtracting the  
178 mean number of daughters for each age.

179 Models were run using Stan (v.2.19.1) and the *rethinking* package (v. 1.93; McElreath,  
180 2020) in R (v. 3.6.2; R Core Team 2019).

## 181 RESULTS

182 For perspective on the individual sociality measures, Figure 1 illustrates how the  
183 estimates of *grooming*, *coalitionary support*, and *foraging in proximity* by adult females  
184 compare to the estimates for other age-sex classes. Females differ the most from the other  
185 age-sex classes in their distribution of *grooming giving* measures. A majority of the females  
186 (80%) groom more than an average monkey in the population (Figure 1, panel A). The female  
187 distributions for the rest of the behavioral domains are comparatively similar to the other age-  
188 sex distributions, indicating that females behave similarly to adult males and immatures in  
189 those domains.

190 We plotted the pairwise correlations between each of the sociality measures in Figure 2  
191 in order to investigate if female profiles are similar across all five measures, e.g. is a frequent  
192 groomer also a frequent recipient of grooming and coalitional support? Within the coalitionary  
193 aggression domain, estimates of female giving and receiving coalitionary support were highly  
194 correlated ( $r=0.97$ ). In the grooming domain, the correlation between giving and receiving  
195 estimates was moderate ( $r=0.57$ ). The correlations across behavioral domains are smaller than  
196 within a domain, between 0.15 and 0.37.

197 Our primary objective was to test the effects of sociality on survivorship. Table 1  
198 presents the Cox proportional hazards model posterior mean estimates and the 95% Highest

199 Posterior Density Interval (HPDI), representing the narrowest interval containing the 95%  
200 probability mass. Independent of the effects of covariates, females who groomed others more  
201 survived at higher rates than other females. The other sociality measures had mean estimates  
202 consistent with sociality predicting greater survival, but their HPDI intervals were wide and  
203 included zero, suggesting uncertainty about the effects of these estimates.

204 To facilitate the interpretation of the Cox proportional hazards model coefficients, we  
205 plotted model predictions showing the probability of dying in a given year (Figure 3). Across all  
206 five sociality measures, the less social females have a greater probability of dying than more  
207 social females, but only the slopes for *groom giving* confidently suggest a beneficial effect on  
208 survivorship (Figure 3, panel A).

209

210 **Figure 1.** Posterior mean distributions of annual individual sociality measures for each type of  
211 behavior. The orange density represents adult females whereas the white density represents  
212 the rest of the population. The population base rate is normalized at approximately zero.  
213  
214

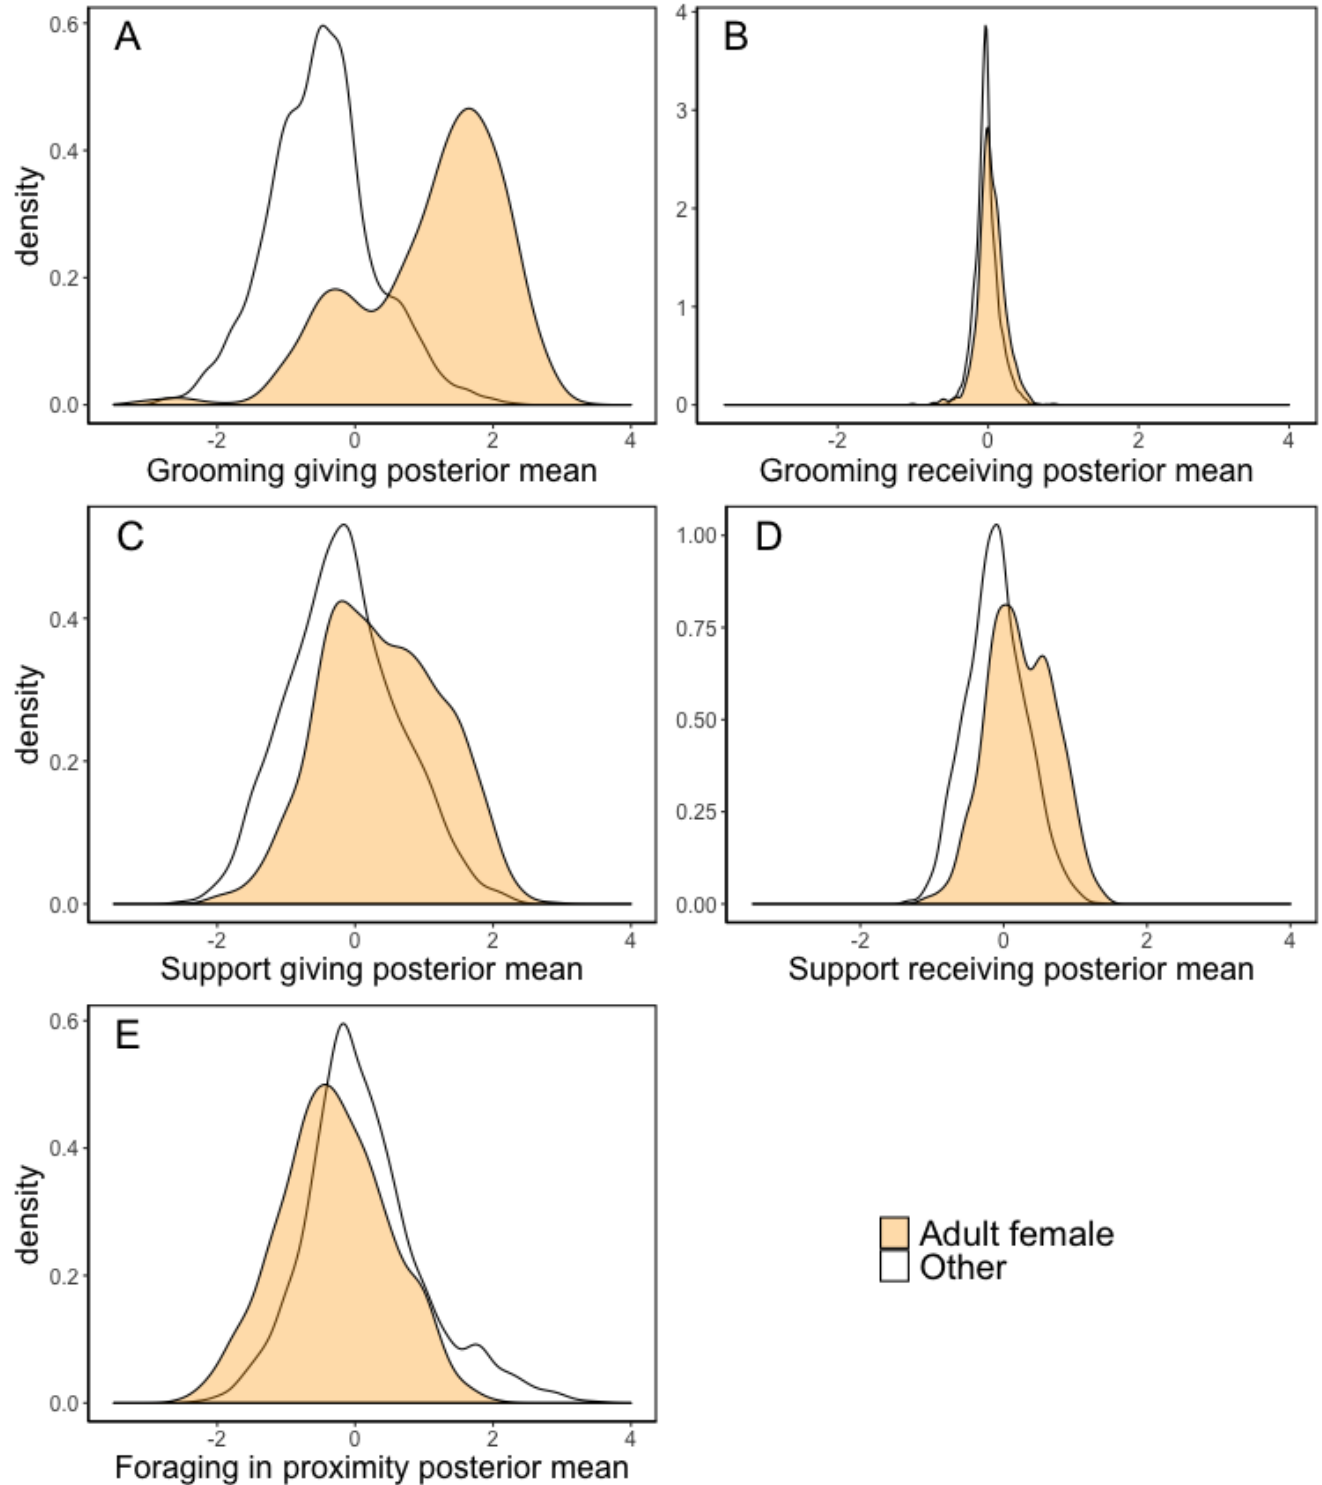

215

216 **Figure 2.** Bivariate correlations of individual sociality measures. Each point represents the  
 217 posterior mean of an annual estimate for an individual female in the sample.

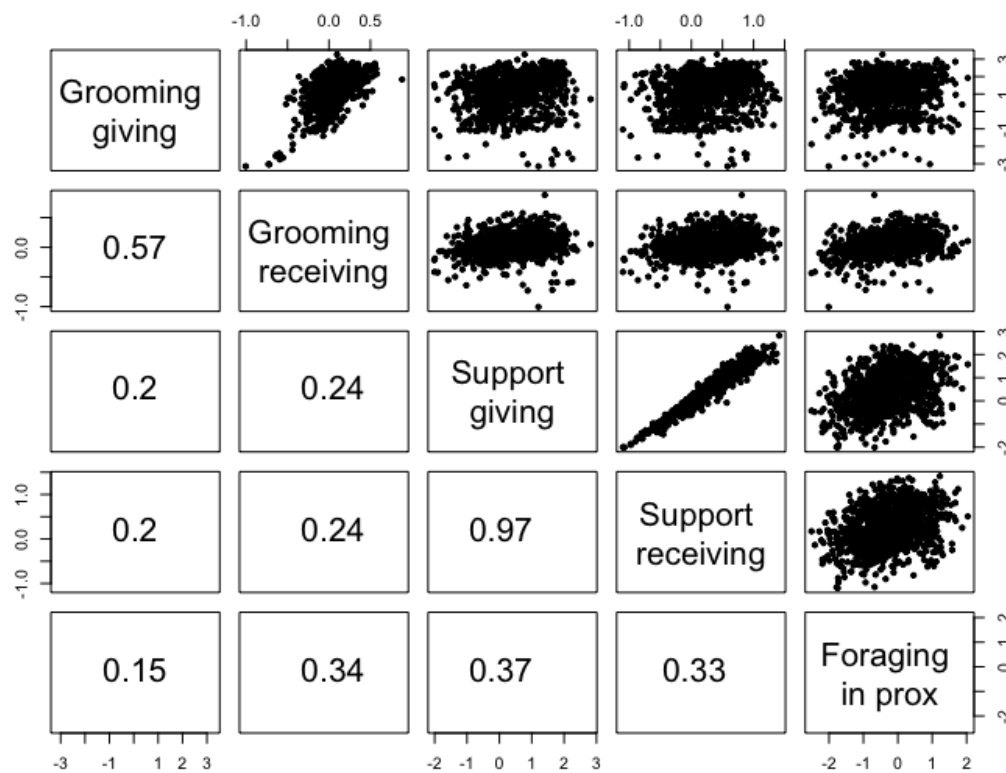

218

219 **Table 1.** Estimates of fixed effects of each of the Cox proportional hazards models: posterior  
 220 means and 95% HPDI (see supplemental material for graphical representation of this table).

221

| Parameter          | Sociality measure   |                     |                     |                     |                       |
|--------------------|---------------------|---------------------|---------------------|---------------------|-----------------------|
|                    | Grooming giving     | Grooming receiving  | Support giving      | Support receiving   | Foraging in proximity |
| Intercept          | 9.20 [8.86,9.56]    | 9.13 [8.78,9.52]    | 9.07 [8.74,9.42]    | 9.06 [8.73,9.41]    | 9.08 [8.74,9.42]      |
| $\beta$ sociality  | 0.49 [0.26,0.70]    | 0.19 [-0.09,0.45]   | 0.11 [-0.21,0.45]   | 0.06 [-0.28,0.40]   | 0.16 [-0.18,0.47]     |
| $\beta$ rank       | -0.20 [-0.51,0.11]  | -0.11 [-0.45,0.24]  | -0.10 [-0.45,0.24]  | -0.10 [-0.47,0.28]  | -0.16 [-0.54,0.23]    |
| $\beta$ age        | -0.57 [-0.88,-0.25] | -0.66 [-0.96,-0.37] | -0.66 [-0.96,-0.37] | -0.68 [-0.99,-0.38] | -0.69 [-0.98,-0.39]   |
| $\beta$ daughters  | -0.08 [-0.45,0.28]  | -0.08 [-0.45,0.31]  | -0.07 [-0.44,0.31]  | -0.06 [-0.43,0.30]  | -0.05 [-0.43,0.32]    |
| $\beta$ mother     | 0.26 [-0.09,0.63]   | 0.31 [-0.02,0.66]   | 0.33 [-0.01,0.67]   | 0.32 [-0.01,0.65]   | 0.33 [-0.01,0.66]     |
| $\beta$ group size | 0.19 [-0.1,0.49]    | 0.18 [-0.10,0.46]   | 0.19 [-0.10,0.48]   | 0.18 [-0.1,0.46]    | 0.18 [-0.09,0.46]     |

222

223 **Figure 3.** The predicted annual probabilities of dying at two representative ages (10 and 30) as a  
224 function of the sociality levels in five behavioral domains, as calculated from the Cox  
225 proportional hazards models. For both ages, we assumed median group size, median rank, and  
226 average number of daughters for the age. For 10-year-old females, we assumed a co-resident  
227 mother, while predictions for the 30-year-old assume the mother is deceased.  
228

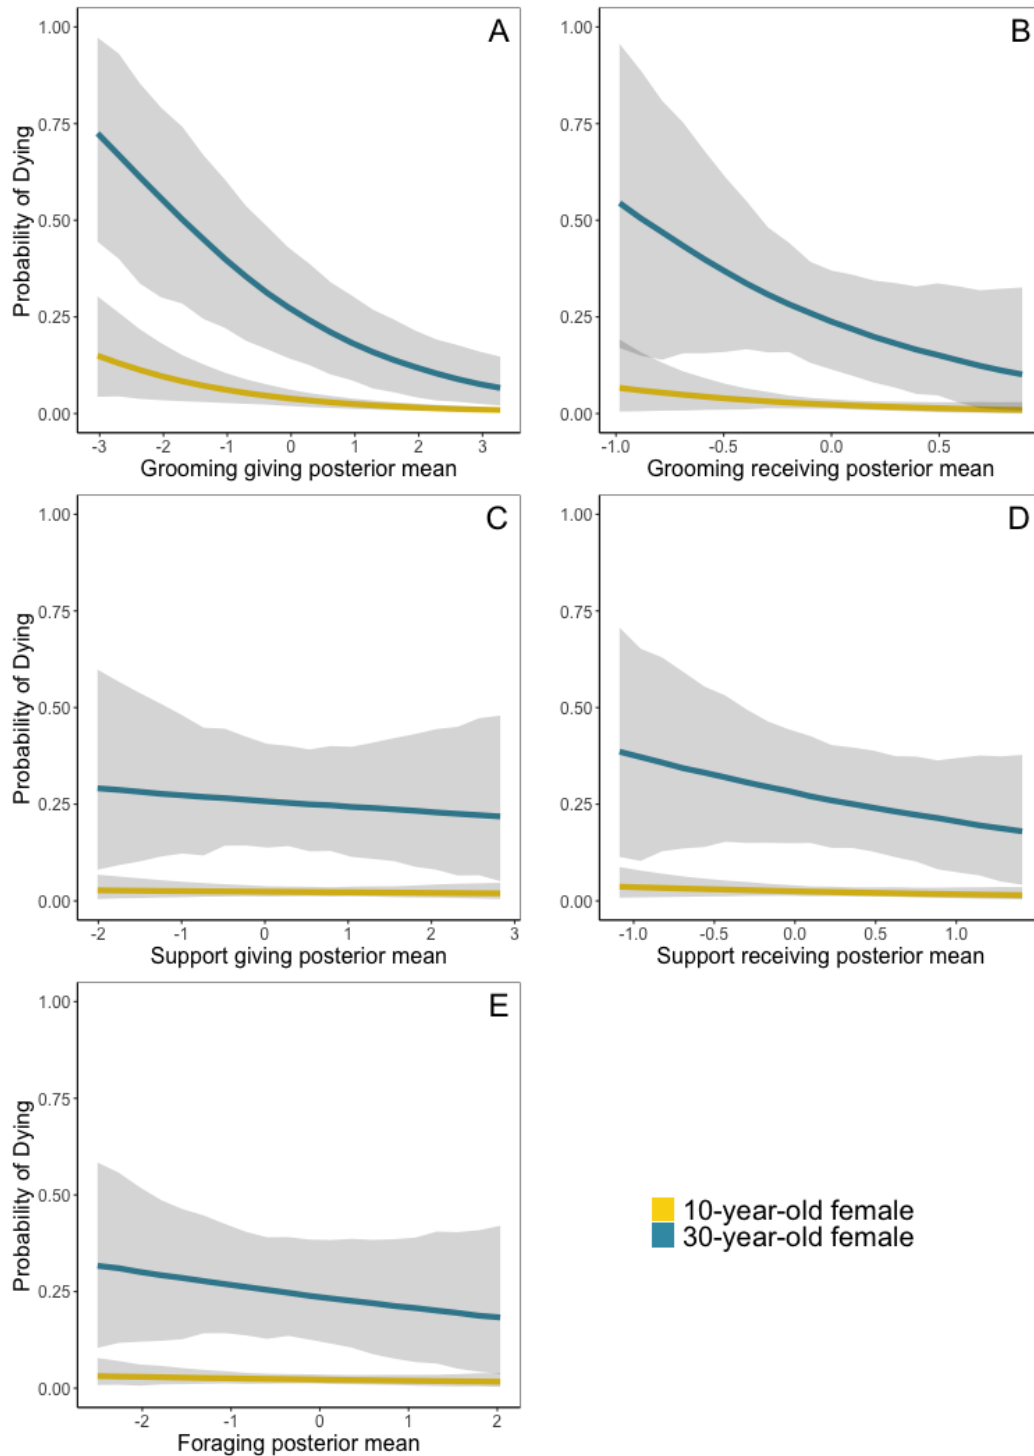

230 DISCUSSION

231           In female white-faced capuchin monkeys, providing grooming to others is associated  
232 with greater survival rates. Females who provide more grooming die at lower rates than  
233 females who engage in this behavior less often. By contrast, there was no strong evidence that  
234 females who receive more grooming, participate more often in coalitionary aggression, and  
235 forage more often in close proximity of others also have higher survivorship. Our results in the  
236 grooming domain are consistent with findings that social integration is associated with  
237 longevity in humans (Holt-Lunstad et al., 2010) and adds a neotropical primate species to the  
238 list of mammalian species where a similar association between sociality and longevity has been  
239 demonstrated (Fagen and Fagen, 2004; Yee et al. 2008; Cameron et al. 2009; Silk et al., 2010;  
240 Archie et al., 2014; Brent, 2017; Thompson and Cords, 2018).

241           A biologically interesting question deals with the mechanisms that facilitate the  
242 relationship between sociality and longevity. In the human literature, two general models have  
243 been proposed for the influence of social relationships on health (Holt-Lunstad et al. 2010).  
244 First, the stress buffering model assumes that social relationships provide resources that affect  
245 either behavioral or neuroendocrine responses which buffer the influence of stress on health.  
246 Second, the main effects model assumes that participating in social relationships itself  
247 encourages healthy behaviors.

248           In the primate literature, recently there has been discussion of the specific pathways  
249 that connect social behavior to fitness (Ostner and Schülke 2018; Thompson, 2019). Consistent  
250 with the stress buffering model, providing grooming can have either direct effects on longevity  
251 or influence other behaviors that in turn influence survival.

252           Directly, females might derive benefits when grooming others, such as social bonding  
253 through the release of hormones (Dunbar 2010). Both providing and receiving grooming  
254 seemingly influence oxytocin and glucocorticoid levels in primates (reviewed in Crockford et al.  
255 2017), but our analysis reveals a stronger effect of providing grooming on survival in  
256 comparison to receiving grooming. The variation in engaging in these behaviors among  
257 individuals helps to explain this pattern: Adult females do not vary greatly in how much  
258 grooming they receive; therefore, the neuroendocrine benefits they receive from it are less  
259 likely to differentiate the stress buffering among individuals. However, females vary  
260 considerably in how much they are likely to groom others, and those who are the most avid  
261 groomers are likely to derive the greatest benefits related to stress reduction.

262           Indirectly, grooming interactions potentially shape females' participation in coalitionary  
263 behavior via the effects of mediating variables. Notably, the females who groom others the  
264 most are usually not the same females who participate in coalitionary aggression the most  
265 frequently. It is possible that avid groomers receive less aggression and, as a result, fewer of the  
266 detrimental consequences that directly reduce survival.

267           In this study, confidence in the statistical findings is enhanced by a methodological  
268 approach that incorporates the measurement uncertainty that typifies observational data. Data  
269 from the natural habitats are notoriously difficult to gather. Inevitably, the records for social  
270 interactions are sparse (Farine, 2015) and some individuals are observed more often than  
271 others (Silk et al., 2013). Based on limited observational data, some dyads may appear to have  
272 no social relationship, whereas if behavioral sampling were sufficiently dense, they would be  
273 observed to interact, albeit rarely (Farine, 2015).

274 To address the uneven sampling effort of individuals and social groups in our dataset,  
275 we adapted the Social Relations Model. Based on multilevel partial pooling (McElreath 2002),  
276 the resulting estimates of sociality reflect the latent uncertainty of observational data. We  
277 generated these estimates from dyadic observations of adult females with all other group  
278 members rather than demographic subsets of peers as in previous studies (e.g. Silk et al., 2010;  
279 Archie et al., 2014; Kalbitzer et al., 2017). The methods used in this study, however, offer  
280 similar benefits for research on subgroups of dyads and more generally provide an alternative  
281 that is suited to the imbalanced data structures of observational research.

## 282 CONCLUSION

283 Across taxa, research on sociality has revealed diverse effects on components of fitness.  
284 This study examines sociality in detail, showing that grooming others is the social behavior that  
285 most prominently distinguishes individuals, and this aspect of sociality concomitantly predicts  
286 the survivorship of adult female capuchins. These results accentuate the need for greater  
287 attention to the mechanistic pathways that connect sociality to fitness (Ostner and Schülke,  
288 2018). As longitudinal data become increasingly common in studies of animal behavior, careful  
289 analyses can better elucidate the evolutionary consequences of variation in sociality among  
290 individuals.

## 291 ETHICS

292 The study was strictly observational, all protocols were approved by UCLA's Animal Care  
293 Committee (protocol 2016-022). All necessary permits were obtained from SINAC and MINAE  
294 (the Costa Rican government bodies responsible for research on wildlife) and renewed every 6  
295 months over the course of the study; the most recent scientific passport number being #117-



296 2019-ACAT and the most recent permit being Resolución # M-P-SINAC-PNI-ACAT-072-2019. This  
297 research is in compliance with the Animal Behavior Society's Guidelines for the Use of Animals  
298 in Research.

#### 299 DATA AND CODE ACCESSIBILITY

300 The data and code used to produce the analyses in this paper are available at:

301 [www.doi.org/10.5281/zenodo.3961479](https://www.doi.org/10.5281/zenodo.3961479)

#### 302 AUTHOR CONTRIBUTIONS

303 K.K. and S.E.P. designed the study, wrote the queries to assembled the data set. K.K. collected  
304 some of the data. S.E.P. runs the long-term study, wrote the grants funding data collection, was  
305 the primary data collector and data cleaner, supervised the data collection and cleaning done  
306 by others, and manages the database. K.K. and J.K. developed SRM analyses and K.K. set up and  
307 carried out the implementation. K.K. and A.W. developed and analyzed Bayesian Cox  
308 proportional hazards model. K.K. took the lead in writing the manuscript. All authors provided  
309 critical feedback and helped to write the manuscript.

#### 310 COMPETING INTERESTS

311 We declare we have no competing interests.

#### 312 FUNDING

313 K.K. was supported by a University of California-Los Angeles (UCLA) Pauley Fellowship, a UCLA  
314 Dissertation Year Fellowship, and by the Max Planck Institute for Evolutionary Anthropology.  
315 This material is based on data collection supported by funding provided to S.E.P. by the  
316 National Science Foundation (under grant numbers 1638428, 0613226, 0848360, and 1232371),  
317 the Max Planck Institute for Evolutionary Anthropology, the L.S.B. Leakey Foundation (5 grants),

318 the National Geographic Society (5 grants), the Templeton World Charity Foundation (grant  
319 #0208), the Wild Capuchin Foundation, and multiple Committee on Research grants from UCLA.

## 320 ACKNOWLEDGEMENTS

321 The following field assistants contributed significant amounts of data to the Lomas Barbudal  
322 Monkey Project dataset: C. Angyal, A. Autor, B. Barrett, L. Beaudrot, M. Bergstrom, R. Berl, A.  
323 Bjorkman, L. Blankenship, T. Borcuch, J. Broesch, D. Bush, J. Butler, F. Campos, C. Carlson, A.  
324 Cobden, M. Corrales, J. Damm, B. Davis, C. deRango, N. Donati, C. Dillis, G. Dower, R. Dower, A.  
325 Duchesneau, K. Feilen, J. Fenton, S. Fiello, K. Fisher, A. Fuentes J., M. Fuentes A., T. Fuentes, C.  
326 Gault, H. Gilkenson, I. Godoy, I. Gottlieb, J. Gričiute, L.M. Guevara R., L. Hack, R. Hammond, S.  
327 Herbert, C. Hirsch, M. Hoffman, A. Hofner, C. Holman, J. Hubbard, S. Hyde, M. Jackson, O.  
328 Jacobson, E. Johnson, L. Johnson, S. Lee, S. Leinwand, T. Lord, M. Kay, E. Kennedy, D. Kerhoas-  
329 Essens, E. Johnson, S. Kessler, B. Krimmel, W. Lammers, S. Lopez, S. MacCarter, J. Mackenzie,  
330 M. Mayer, F. McKibben, W. Meno, A. Mensing, M. Milstein, C. Mitchell, Y. Namba, A. Neyer, C.  
331 O'Connell, J. C. Ordoñez, J., N. Parker, B. Pav, R. Popa, K. Potter, K. Ratliff, K. Reinhardt, N.  
332 Roberts Buceta, E. Rothwell, J. Rottman, H. Ruffler, S. Sanford, M. Saul, E. Seabright, I.  
333 Schamberg, S. Schembari, N. Schleissman, C. Schmitt, S. Schulze, A. Scott, S. Sita, J. Shih, K.  
334 Stewart, W. Tucker, E. Urquhart, K. van Atta, J. Vandermeer, L. van Zuidam, J. Verge, V. Vonau,  
335 A. Walker-Bolton, E. Wikberg, E. Williams, L. Wolf, and D. Wood. We thank H. Gilkenson and W.  
336 Lammers for long-term management of the field site during 2002-2013. We thank the Costa  
337 Rican park service (Sistema Nacional de Áreas de Conservación and Área de Conservación  
338 Tempisque), Hacienda Pelon de la Bajura, Hacienda Brin D'Amor, and the residents of San  
339 Ramon de Bagaces for permission to work on their land. D. Cohen assisted with database

340 management and queries. This paper has benefited from helpful discussions with H. Clark  
341 Barrett, Donald Cohen, Joseph Manson, Mary Brooke McElreath, Oliver Schülke, and Julia  
342 Ostner.

343

344

345

346

347

348

349

350

351

352

353

354

355

356

357

358

359

360

361

362 REFERENCES

- 363 Archie, E. A., Tung, J., Clark, M., Altmann, J., & Alberts, S. C. (2014). Social affiliation matters:  
364 Both same-sex and opposite-sex relationships predict survival in wild female baboons.  
365 *Proceedings of the Royal Society B: Biological Sciences*, 281(1793), 20141261.
- 366 Brent, L. J. N., Ruiz-Lambides, A., & Platt, M. L. (2017). Family network size and survival across  
367 the lifespan of female macaques. *Proceedings of the Royal Society B: Biological Sciences*,  
368 284(1854), 20170515.
- 369 Cameron, EZ, Setsaas, TH, & Linklater, WL (2009). Social bonds between unrelated females  
370 increase reproductive success in feral horses. *Proceedings of the National Academy of*  
371 *Sciences* , 106 (33), 13850-13853.
- 372 Clutton-Brock, T. H. (1988). *Reproductive success: Studies of individual variation in contrasting*  
373 *breeding systems*. University of Chicago Press.
- 374 Crockford, C., Deschner, T., & Wittig, R. M. (2017). The role of oxytocin in social buffering: What  
375 do primate studies add? In *Behavioral Pharmacology of Neuropeptides: Oxytocin* (pp.  
376 155-173). Springer, Cham.
- 377 Dunbar, R. I. M. (2010). The social role of touch in humans and primates: Behavioural function  
378 and neurobiological mechanisms. *Neuroscience & Biobehavioral Reviews*, 34(2), 260–  
379 268. <https://doi.org/10.1016/j.neubiorev.2008.07.001>
- 380 Fagen, R., & Fagen, J. (2004). Juvenile survival and benefits of play behaviour in brown bears,  
381 *Ursus arctos*. *Evolutionary Ecology Research*, 6(1), 89–102.
- 382 Farine, D. R. (2015). Proximity as a proxy for interactions: Issues of scale in social network  
383 analysis. *Animal Behaviour*, 104, e1–e5.

- 384 Fedigan, L. M., Carnegie, S. D., & Jack, K. M. (2008). Predictors of reproductive success in female  
385 white-faced capuchins (*Cebus capucinus*). *American Journal of Physical Anthropology*,  
386 *137*(1), 82–90.
- 387 Fragaszy, D. M., Visalberghi, E., & Fedigan, L. M. (2004). *The complete capuchin: The biology of*  
388 *the genus Cebus*. Cambridge University Press.
- 389 Gilby, I. C., Brent, L. J., Wroblewski, E. E., Rudicell, R. S., Hahn, B. H., Goodall, J., & Pusey, A. E.  
390 (2013). Fitness benefits of coalitionary aggression in male chimpanzees. *Behavioral*  
391 *Ecology and Sociobiology*, *67*(3), 373–381.
- 392 Gros-Louis, J., Perry, S., & Manson, J. H. (2003). Violent coalitionary attacks and intraspecific  
393 killing in wild white-faced capuchin monkeys (*Cebus capucinus*). *Primates*, *44*(4), 341–  
394 346.
- 395 Hinde, R. A. (1976). Interactions, relationships and social structure. *Man*, 1–17.
- 396 Holt-Lunstad, J., Smith, T. B., & Layton, J. B. (2010). Social relationships and mortality risk: A  
397 meta-analytic review. *PLoS Medicine*, *7*(7), e1000316.
- 398 Kalbitzer, U., Bergstrom, M. L., Carnegie, S. D., Wikberg, E. C., Kawamura, S., Campos, F. A., Jack,  
399 K. M., & Fedigan, L. M. (2017). Female sociality and sexual conflict shape offspring  
400 survival in a Neotropical primate. *Proceedings of the National Academy of Sciences*,  
401 *114*(8), 1892–1897.
- 402 Koster, J., Leckie, G., Miller, A., & Hames, R. (2015). Multilevel modeling analysis of dyadic  
403 network data with an application to Ye'kwana food sharing. *American Journal of Physical*  
404 *Anthropology*, *157*(3), 507–512.
- 405 Koster, J., Leckie, G., & Aven, B. (2020). Statistical methods and software for the Multilevel

- 406 Social Relations Model. *Field Methods*, 32(4), 339–345.
- 407
- 408 Manson, J. H., Navarrete, C. D., Silk, J. B., & Perry, S. (2004). Time-matched grooming in female  
409 primates? New analyses from two species. *Animal Behaviour*, 67(3), 493–500.
- 410 McElreath, R. (2020). *Statistical rethinking: A Bayesian course with examples in R and Stan*. CRC  
411 press.
- 412 McElreath, R. (2020). rethinking: Statistical rethinking book package (R package Version 1.93).  
413 <https://github.com/rmcelreath/rethinking>.
- 414
- 415 Nuñez, C. M., Adelman, J. S., & Rubenstein, D. I. (2014). Sociality increases juvenile survival after  
416 a catastrophic event in the feral horse (*Equus caballus*). *Behavioral Ecology*, 26(1), 138–  
417 147.
- 418 Ostner, J., & Schuelke, O. (2018). Linking sociality to fitness in primates: A call for mechanisms.  
419 In *Advances in the Study of Behavior* (Vol. 50, pp. 127–175). Elsevier.
- 420 Perry, S. (1996). Female-female social relationships in wild white-faced capuchin monkeys,  
421 *Cebus capucinus*. *American Journal of Primatology*, 40(2), 167–182.
- 422 Perry, S. (2012). The behavior of wild white-faced capuchins: Demography, life history, social  
423 relationships, and communication. In *Advances in the study of behavior* (Vol. 44, pp.  
424 135–181). Elsevier.
- 425 Perry, S., Godoy, I., & Lammers, W. (2012). The Lomas Barbudal Monkey Project: Two decades  
426 of research on *Cebus capucinus*. In *Long-term field studies of primates* (pp. 141–163).  
427 Springer.
- 428 Perry, S., Manson, J. H., & Perry, S. (2009). *Manipulative Monkeys*. Harvard University Press.

- 429 Porter, C. A., Page, S. L., Czelusniak, J., Schneider, H., Schneider, M. P. C., Sampaio, I., &  
430 Goodman, M. (1997). Phylogeny and Evolution of Selected Primates as Determined by  
431 Sequences of the  $\epsilon$ -Globin Locus and 5' Flanking Regions. *International Journal of*  
432 *Primatology*, 18(2), 261–295. <https://doi.org/10.1023/A:1026328804319>
- 433 R Core Team. (2020). R: A language and environment for statistical computing. Vienna,  
434 Austria: R Foundation for Statistical Computing.
- 435  
436 Roelfs, D. J., Shor, E., Kalish, R., & Yogeve, T. (2011). The rising relative risk of mortality for  
437 singles: Meta-analysis and meta-regression. *American Journal of Epidemiology*, 174(4),  
438 379–389.
- 439 Schülke, O., Bhagavatula, J., Vigilant, L., & Ostner, J. (2010). Social bonds enhance reproductive  
440 success in male macaques. *Current Biology*, 20(24), 2207–2210.
- 441 Shor, E., & Roelfs, D. J. (2015). Social contact frequency and all-cause mortality: A meta-analysis  
442 and meta-regression. *Social Science & Medicine*, 128, 76–86.
- 443 Shor, E., Roelfs, D. J., & Yogeve, T. (2013). The strength of family ties: A meta-analysis and meta-  
444 regression of self-reported social support and mortality. *Social Networks*, 35(4), 626–  
445 638.
- 446 Silk, J. B. (2009). Nepotistic cooperation in non-human primate groups. *Philosophical*  
447 *Transactions of the Royal Society B: Biological Sciences*, 364(1533), 3243–3254.
- 448 Silk, J. B., Alberts, S. C., & Altmann, J. (2003). Social bonds of female baboons enhance infant  
449 survival. *Science*, 302(5648), 1231–1234.

- 450 Silk, J. B., Beehner, J. C., Bergman, T. J., Crockford, C., Engh, A. L., Moscovice, L. R., Wittig, R. M.,  
451 Seyfarth, R. M., & Cheney, D. L. (2010). Strong and consistent social bonds enhance the  
452 longevity of female baboons. *Current Biology*, *20*(15), 1359–1361.
- 453 Silk, J., Cheney, D., & Seyfarth, R. (2013). A practical guide to the study of social relationships.  
454 *Evolutionary Anthropology: Issues, News, and Reviews*, *22*(5), 213–225.
- 455 Snijders, T. A., & Kenny, D. A. (1999). The social relations model for family data: A multilevel  
456 approach. *Personal Relationships*, *6*(4), 471–486.
- 457 Stan Development Team. (2020). RStan: The R interface to Stan (Version 2.19.1).
- 458 Sterck, E. H. M., Watts, D. P., & van Schaik, C. P. (1997). The evolution of female social  
459 relationships in nonhuman primates. *Behavioral Ecology and Sociobiology*, *41*(5), 291–  
460 309. <https://doi.org/10.1007/s002650050390>
- 461 Thompson, N. A. (2019). Understanding the links between social ties and fitness over the life  
462 cycle in primates. *Behaviour*, *1*(aop), 1–50.
- 463 Thompson, N. A., & Cords, M. (2018). Stronger social bonds do not always predict greater  
464 longevity in a gregarious primate. *Ecology and Evolution*, *8*(3), 1604–1614.
- 465 Yee, J. R., Cavigelli, S. A., Delgado, B., & McClintock, M. K. (2008). Reciprocal affiliation among  
466 adolescent rats during a mild group stressor predicts mammary tumors and lifespan.  
467 *Psychosomatic Medicine*, *70*(9), 1050.
- 468
